# Supplementary material for: Federated Learning on Clinical Benchmark Data: Performance Assessment
Source: PubMed Central journal article supplement (PMC7652692; doi:10.2196/20891), 2020-10-26

### Multimedia Appendix 1. Server-Client communication logic

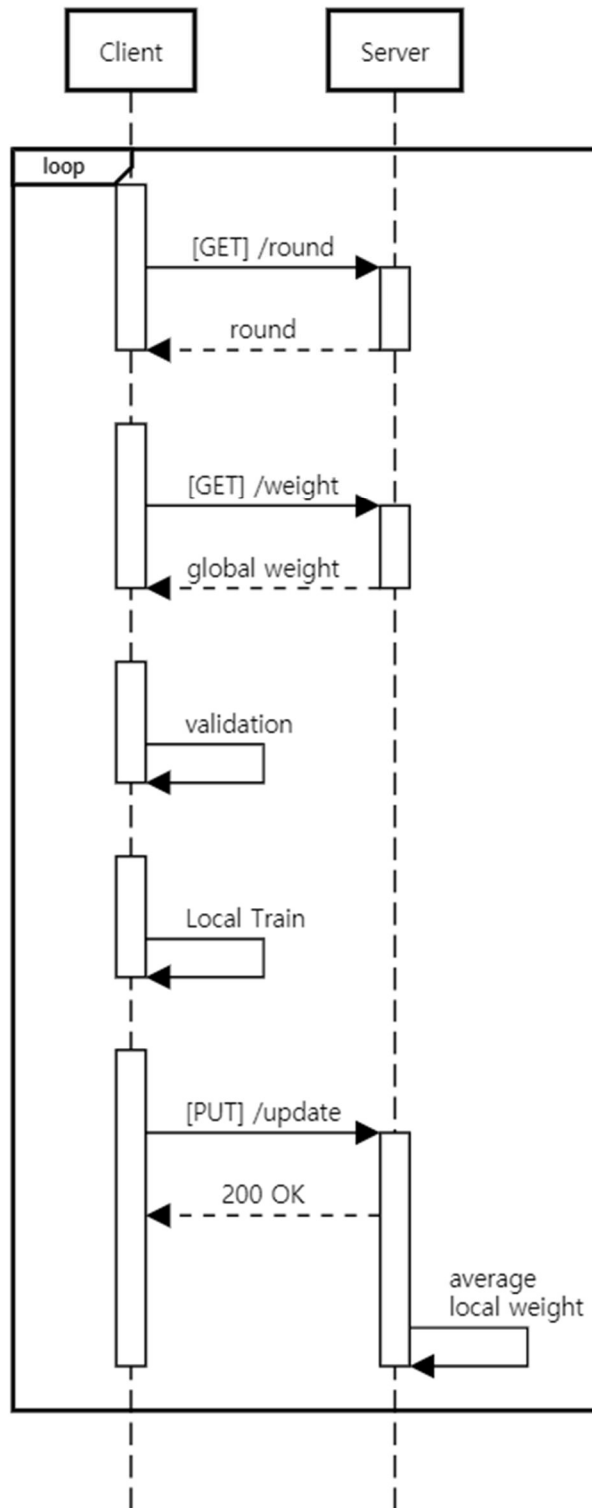

Supplement: jmir_v22i10e20891_app1.pdf [file jmir_v22i10e20891_app1.pdf]
