# Supplementary material for: Federated Learning on Clinical Benchmark Data: Performance Assessment
Source: PubMed Central journal article supplement (PMC7652692; doi:10.2196/20891), 2020-10-26
Supplement: jmir_v22i10e20891_app2.pdf [file jmir_v22i10e20891_app2.pdf]

**Multimedia Appendix 2.** Confusion matrices for the MNIST experiments. (A) Centralized machine learning (CML). (B) Basic FL. (C) Imbalanced FL. (D) Skewed FL. (E) Imbalanced and skewed FL.

|                                                                                                                                                                                                                                                                                                                                                                                                                                                                                                                                                                                                                                                                                                                                                                                                                                                                                                                                                                                                                                                                                                                                                                                                                                                                                    |       |       |     |     |     |     |       |     |     |   |   |       |   |   |   |   |   |   |   |   |    |   |       |    |    |   |   |    |    |   |   |   |    |     |   |    |   |    |    |   |   |   |   |   |     |   |    |   |   |    |   |   |   |    |    |     |    |   |    |    |    |   |    |   |    |    |     |   |   |   |   |    |    |   |   |   |   |       |   |    |   |   |    |    |    |    |    |   |     |   |   |   |   |   |    |    |   |    |   |     |                                                                                                                                                                                                                                                                                                                                                                                                                                                                                                                                                                                                                                                                                                                                                                                                                                                                                                                                                                                                                                                                                                                                                                                                                                                                                           |     |   |   |   |   |   |   |   |   |   |   |       |   |   |   |   |   |   |    |   |    |    |     |    |   |   |    |    |    |   |   |   |    |     |   |    |   |    |    |    |   |   |    |   |     |   |    |   |    |    |    |   |   |    |    |     |    |    |    |   |    |   |   |   |   |   |     |   |   |   |   |    |    |   |   |   |   |     |   |    |    |    |    |    |   |    |    |    |     |    |    |   |   |   |    |   |   |    |    |     |
|------------------------------------------------------------------------------------------------------------------------------------------------------------------------------------------------------------------------------------------------------------------------------------------------------------------------------------------------------------------------------------------------------------------------------------------------------------------------------------------------------------------------------------------------------------------------------------------------------------------------------------------------------------------------------------------------------------------------------------------------------------------------------------------------------------------------------------------------------------------------------------------------------------------------------------------------------------------------------------------------------------------------------------------------------------------------------------------------------------------------------------------------------------------------------------------------------------------------------------------------------------------------------------|-------|-------|-----|-----|-----|-----|-------|-----|-----|---|---|-------|---|---|---|---|---|---|---|---|----|---|-------|----|----|---|---|----|----|---|---|---|----|-----|---|----|---|----|----|---|---|---|---|---|-----|---|----|---|---|----|---|---|---|----|----|-----|----|---|----|----|----|---|----|---|----|----|-----|---|---|---|---|----|----|---|---|---|---|-------|---|----|---|---|----|----|----|----|----|---|-----|---|---|---|---|---|----|----|---|----|---|-----|-------------------------------------------------------------------------------------------------------------------------------------------------------------------------------------------------------------------------------------------------------------------------------------------------------------------------------------------------------------------------------------------------------------------------------------------------------------------------------------------------------------------------------------------------------------------------------------------------------------------------------------------------------------------------------------------------------------------------------------------------------------------------------------------------------------------------------------------------------------------------------------------------------------------------------------------------------------------------------------------------------------------------------------------------------------------------------------------------------------------------------------------------------------------------------------------------------------------------------------------------------------------------------------------|-----|---|---|---|---|---|---|---|---|---|---|-------|---|---|---|---|---|---|----|---|----|----|-----|----|---|---|----|----|----|---|---|---|----|-----|---|----|---|----|----|----|---|---|----|---|-----|---|----|---|----|----|----|---|---|----|----|-----|----|----|----|---|----|---|---|---|---|---|-----|---|---|---|---|----|----|---|---|---|---|-----|---|----|----|----|----|----|---|----|----|----|-----|----|----|---|---|---|----|---|---|----|----|-----|
| <table border="1"> <tbody> <tr><td>969</td><td>0</td><td>1</td><td>0</td><td>0</td><td>2</td><td>2</td><td>2</td><td>2</td><td>2</td></tr> <tr><td>0</td><td>1,121</td><td>3</td><td>1</td><td>0</td><td>1</td><td>3</td><td>2</td><td>4</td><td>0</td></tr> <tr><td>4</td><td>2</td><td>1,012</td><td>2</td><td>2</td><td>0</td><td>2</td><td>4</td><td>4</td><td>0</td></tr> <tr><td>0</td><td>0</td><td>2</td><td>992</td><td>0</td><td>4</td><td>0</td><td>5</td><td>4</td><td>3</td></tr> <tr><td>3</td><td>0</td><td>3</td><td>0</td><td>952</td><td>0</td><td>3</td><td>2</td><td>2</td><td>12</td></tr> <tr><td>3</td><td>0</td><td>0</td><td>7</td><td>1</td><td>868</td><td>6</td><td>1</td><td>4</td><td>2</td></tr> <tr><td>5</td><td>3</td><td>2</td><td>1</td><td>5</td><td>3</td><td>939</td><td>0</td><td>0</td><td>0</td></tr> <tr><td>0</td><td>2</td><td>8</td><td>4</td><td>0</td><td>0</td><td>0</td><td>1,007</td><td>2</td><td>5</td></tr> <tr><td>6</td><td>0</td><td>3</td><td>5</td><td>6</td><td>5</td><td>4</td><td>4</td><td>938</td><td>3</td></tr> <tr><td>3</td><td>2</td><td>0</td><td>6</td><td>13</td><td>2</td><td>1</td><td>7</td><td>6</td><td>969</td></tr> </tbody> </table> <p style="text-align: center;">A</p>                          | 969   | 0     | 1   | 0   | 0   | 2   | 2     | 2   | 2   | 2 | 0 | 1,121 | 3 | 1 | 0 | 1 | 3 | 2 | 4 | 0 | 4  | 2 | 1,012 | 2  | 2  | 0 | 2 | 4  | 4  | 0 | 0 | 0 | 2  | 992 | 0 | 4  | 0 | 5  | 4  | 3 | 3 | 0 | 3 | 0 | 952 | 0 | 3  | 2 | 2 | 12 | 3 | 0 | 0 | 7  | 1  | 868 | 6  | 1 | 4  | 2  | 5  | 3 | 2  | 1 | 5  | 3  | 939 | 0 | 0 | 0 | 0 | 2  | 8  | 4 | 0 | 0 | 0 | 1,007 | 2 | 5  | 6 | 0 | 3  | 5  | 6  | 5  | 4  | 4 | 938 | 3 | 3 | 2 | 0 | 6 | 13 | 2  | 1 | 7  | 6 | 969 | <table border="1"> <tbody> <tr><td>967</td><td>0</td><td>1</td><td>1</td><td>0</td><td>3</td><td>4</td><td>1</td><td>1</td><td>2</td></tr> <tr><td>0</td><td>1,122</td><td>2</td><td>1</td><td>0</td><td>1</td><td>5</td><td>1</td><td>3</td><td>0</td></tr> <tr><td>5</td><td>2</td><td>998</td><td>6</td><td>3</td><td>1</td><td>4</td><td>8</td><td>5</td><td>0</td></tr> <tr><td>0</td><td>0</td><td>6</td><td>983</td><td>0</td><td>5</td><td>1</td><td>7</td><td>5</td><td>3</td></tr> <tr><td>2</td><td>0</td><td>3</td><td>1</td><td>950</td><td>0</td><td>5</td><td>2</td><td>2</td><td>17</td></tr> <tr><td>5</td><td>1</td><td>0</td><td>13</td><td>1</td><td>853</td><td>9</td><td>1</td><td>6</td><td>3</td></tr> <tr><td>5</td><td>3</td><td>1</td><td>1</td><td>7</td><td>5</td><td>936</td><td>0</td><td>0</td><td>0</td></tr> <tr><td>1</td><td>9</td><td>10</td><td>4</td><td>3</td><td>1</td><td>0</td><td>991</td><td>0</td><td>9</td></tr> <tr><td>3</td><td>2</td><td>5</td><td>7</td><td>5</td><td>7</td><td>3</td><td>4</td><td>938</td><td>0</td></tr> <tr><td>4</td><td>5</td><td>1</td><td>7</td><td>17</td><td>2</td><td>1</td><td>5</td><td>3</td><td>964</td></tr> </tbody> </table> <p style="text-align: center;">B</p>                                   | 967 | 0 | 1 | 1 | 0 | 3 | 4 | 1 | 1 | 2 | 0 | 1,122 | 2 | 1 | 0 | 1 | 5 | 1 | 3  | 0 | 5  | 2  | 998 | 6  | 3 | 1 | 4  | 8  | 5  | 0 | 0 | 0 | 6  | 983 | 0 | 5  | 1 | 7  | 5  | 3  | 2 | 0 | 3  | 1 | 950 | 0 | 5  | 2 | 2  | 17 | 5  | 1 | 0 | 13 | 1  | 853 | 9  | 1  | 6  | 3 | 5  | 3 | 1 | 1 | 7 | 5 | 936 | 0 | 0 | 0 | 1 | 9  | 10 | 4 | 3 | 1 | 0 | 991 | 0 | 9  | 3  | 2  | 5  | 7  | 5 | 7  | 3  | 4  | 938 | 0  | 4  | 5 | 1 | 7 | 17 | 2 | 1 | 5  | 3  | 964 |
| 969                                                                                                                                                                                                                                                                                                                                                                                                                                                                                                                                                                                                                                                                                                                                                                                                                                                                                                                                                                                                                                                                                                                                                                                                                                                                                | 0     | 1     | 0   | 0   | 2   | 2   | 2     | 2   | 2   |   |   |       |   |   |   |   |   |   |   |   |    |   |       |    |    |   |   |    |    |   |   |   |    |     |   |    |   |    |    |   |   |   |   |   |     |   |    |   |   |    |   |   |   |    |    |     |    |   |    |    |    |   |    |   |    |    |     |   |   |   |   |    |    |   |   |   |   |       |   |    |   |   |    |    |    |    |    |   |     |   |   |   |   |   |    |    |   |    |   |     |                                                                                                                                                                                                                                                                                                                                                                                                                                                                                                                                                                                                                                                                                                                                                                                                                                                                                                                                                                                                                                                                                                                                                                                                                                                                                           |     |   |   |   |   |   |   |   |   |   |   |       |   |   |   |   |   |   |    |   |    |    |     |    |   |   |    |    |    |   |   |   |    |     |   |    |   |    |    |    |   |   |    |   |     |   |    |   |    |    |    |   |   |    |    |     |    |    |    |   |    |   |   |   |   |   |     |   |   |   |   |    |    |   |   |   |   |     |   |    |    |    |    |    |   |    |    |    |     |    |    |   |   |   |    |   |   |    |    |     |
| 0                                                                                                                                                                                                                                                                                                                                                                                                                                                                                                                                                                                                                                                                                                                                                                                                                                                                                                                                                                                                                                                                                                                                                                                                                                                                                  | 1,121 | 3     | 1   | 0   | 1   | 3   | 2     | 4   | 0   |   |   |       |   |   |   |   |   |   |   |   |    |   |       |    |    |   |   |    |    |   |   |   |    |     |   |    |   |    |    |   |   |   |   |   |     |   |    |   |   |    |   |   |   |    |    |     |    |   |    |    |    |   |    |   |    |    |     |   |   |   |   |    |    |   |   |   |   |       |   |    |   |   |    |    |    |    |    |   |     |   |   |   |   |   |    |    |   |    |   |     |                                                                                                                                                                                                                                                                                                                                                                                                                                                                                                                                                                                                                                                                                                                                                                                                                                                                                                                                                                                                                                                                                                                                                                                                                                                                                           |     |   |   |   |   |   |   |   |   |   |   |       |   |   |   |   |   |   |    |   |    |    |     |    |   |   |    |    |    |   |   |   |    |     |   |    |   |    |    |    |   |   |    |   |     |   |    |   |    |    |    |   |   |    |    |     |    |    |    |   |    |   |   |   |   |   |     |   |   |   |   |    |    |   |   |   |   |     |   |    |    |    |    |    |   |    |    |    |     |    |    |   |   |   |    |   |   |    |    |     |
| 4                                                                                                                                                                                                                                                                                                                                                                                                                                                                                                                                                                                                                                                                                                                                                                                                                                                                                                                                                                                                                                                                                                                                                                                                                                                                                  | 2     | 1,012 | 2   | 2   | 0   | 2   | 4     | 4   | 0   |   |   |       |   |   |   |   |   |   |   |   |    |   |       |    |    |   |   |    |    |   |   |   |    |     |   |    |   |    |    |   |   |   |   |   |     |   |    |   |   |    |   |   |   |    |    |     |    |   |    |    |    |   |    |   |    |    |     |   |   |   |   |    |    |   |   |   |   |       |   |    |   |   |    |    |    |    |    |   |     |   |   |   |   |   |    |    |   |    |   |     |                                                                                                                                                                                                                                                                                                                                                                                                                                                                                                                                                                                                                                                                                                                                                                                                                                                                                                                                                                                                                                                                                                                                                                                                                                                                                           |     |   |   |   |   |   |   |   |   |   |   |       |   |   |   |   |   |   |    |   |    |    |     |    |   |   |    |    |    |   |   |   |    |     |   |    |   |    |    |    |   |   |    |   |     |   |    |   |    |    |    |   |   |    |    |     |    |    |    |   |    |   |   |   |   |   |     |   |   |   |   |    |    |   |   |   |   |     |   |    |    |    |    |    |   |    |    |    |     |    |    |   |   |   |    |   |   |    |    |     |
| 0                                                                                                                                                                                                                                                                                                                                                                                                                                                                                                                                                                                                                                                                                                                                                                                                                                                                                                                                                                                                                                                                                                                                                                                                                                                                                  | 0     | 2     | 992 | 0   | 4   | 0   | 5     | 4   | 3   |   |   |       |   |   |   |   |   |   |   |   |    |   |       |    |    |   |   |    |    |   |   |   |    |     |   |    |   |    |    |   |   |   |   |   |     |   |    |   |   |    |   |   |   |    |    |     |    |   |    |    |    |   |    |   |    |    |     |   |   |   |   |    |    |   |   |   |   |       |   |    |   |   |    |    |    |    |    |   |     |   |   |   |   |   |    |    |   |    |   |     |                                                                                                                                                                                                                                                                                                                                                                                                                                                                                                                                                                                                                                                                                                                                                                                                                                                                                                                                                                                                                                                                                                                                                                                                                                                                                           |     |   |   |   |   |   |   |   |   |   |   |       |   |   |   |   |   |   |    |   |    |    |     |    |   |   |    |    |    |   |   |   |    |     |   |    |   |    |    |    |   |   |    |   |     |   |    |   |    |    |    |   |   |    |    |     |    |    |    |   |    |   |   |   |   |   |     |   |   |   |   |    |    |   |   |   |   |     |   |    |    |    |    |    |   |    |    |    |     |    |    |   |   |   |    |   |   |    |    |     |
| 3                                                                                                                                                                                                                                                                                                                                                                                                                                                                                                                                                                                                                                                                                                                                                                                                                                                                                                                                                                                                                                                                                                                                                                                                                                                                                  | 0     | 3     | 0   | 952 | 0   | 3   | 2     | 2   | 12  |   |   |       |   |   |   |   |   |   |   |   |    |   |       |    |    |   |   |    |    |   |   |   |    |     |   |    |   |    |    |   |   |   |   |   |     |   |    |   |   |    |   |   |   |    |    |     |    |   |    |    |    |   |    |   |    |    |     |   |   |   |   |    |    |   |   |   |   |       |   |    |   |   |    |    |    |    |    |   |     |   |   |   |   |   |    |    |   |    |   |     |                                                                                                                                                                                                                                                                                                                                                                                                                                                                                                                                                                                                                                                                                                                                                                                                                                                                                                                                                                                                                                                                                                                                                                                                                                                                                           |     |   |   |   |   |   |   |   |   |   |   |       |   |   |   |   |   |   |    |   |    |    |     |    |   |   |    |    |    |   |   |   |    |     |   |    |   |    |    |    |   |   |    |   |     |   |    |   |    |    |    |   |   |    |    |     |    |    |    |   |    |   |   |   |   |   |     |   |   |   |   |    |    |   |   |   |   |     |   |    |    |    |    |    |   |    |    |    |     |    |    |   |   |   |    |   |   |    |    |     |
| 3                                                                                                                                                                                                                                                                                                                                                                                                                                                                                                                                                                                                                                                                                                                                                                                                                                                                                                                                                                                                                                                                                                                                                                                                                                                                                  | 0     | 0     | 7   | 1   | 868 | 6   | 1     | 4   | 2   |   |   |       |   |   |   |   |   |   |   |   |    |   |       |    |    |   |   |    |    |   |   |   |    |     |   |    |   |    |    |   |   |   |   |   |     |   |    |   |   |    |   |   |   |    |    |     |    |   |    |    |    |   |    |   |    |    |     |   |   |   |   |    |    |   |   |   |   |       |   |    |   |   |    |    |    |    |    |   |     |   |   |   |   |   |    |    |   |    |   |     |                                                                                                                                                                                                                                                                                                                                                                                                                                                                                                                                                                                                                                                                                                                                                                                                                                                                                                                                                                                                                                                                                                                                                                                                                                                                                           |     |   |   |   |   |   |   |   |   |   |   |       |   |   |   |   |   |   |    |   |    |    |     |    |   |   |    |    |    |   |   |   |    |     |   |    |   |    |    |    |   |   |    |   |     |   |    |   |    |    |    |   |   |    |    |     |    |    |    |   |    |   |   |   |   |   |     |   |   |   |   |    |    |   |   |   |   |     |   |    |    |    |    |    |   |    |    |    |     |    |    |   |   |   |    |   |   |    |    |     |
| 5                                                                                                                                                                                                                                                                                                                                                                                                                                                                                                                                                                                                                                                                                                                                                                                                                                                                                                                                                                                                                                                                                                                                                                                                                                                                                  | 3     | 2     | 1   | 5   | 3   | 939 | 0     | 0   | 0   |   |   |       |   |   |   |   |   |   |   |   |    |   |       |    |    |   |   |    |    |   |   |   |    |     |   |    |   |    |    |   |   |   |   |   |     |   |    |   |   |    |   |   |   |    |    |     |    |   |    |    |    |   |    |   |    |    |     |   |   |   |   |    |    |   |   |   |   |       |   |    |   |   |    |    |    |    |    |   |     |   |   |   |   |   |    |    |   |    |   |     |                                                                                                                                                                                                                                                                                                                                                                                                                                                                                                                                                                                                                                                                                                                                                                                                                                                                                                                                                                                                                                                                                                                                                                                                                                                                                           |     |   |   |   |   |   |   |   |   |   |   |       |   |   |   |   |   |   |    |   |    |    |     |    |   |   |    |    |    |   |   |   |    |     |   |    |   |    |    |    |   |   |    |   |     |   |    |   |    |    |    |   |   |    |    |     |    |    |    |   |    |   |   |   |   |   |     |   |   |   |   |    |    |   |   |   |   |     |   |    |    |    |    |    |   |    |    |    |     |    |    |   |   |   |    |   |   |    |    |     |
| 0                                                                                                                                                                                                                                                                                                                                                                                                                                                                                                                                                                                                                                                                                                                                                                                                                                                                                                                                                                                                                                                                                                                                                                                                                                                                                  | 2     | 8     | 4   | 0   | 0   | 0   | 1,007 | 2   | 5   |   |   |       |   |   |   |   |   |   |   |   |    |   |       |    |    |   |   |    |    |   |   |   |    |     |   |    |   |    |    |   |   |   |   |   |     |   |    |   |   |    |   |   |   |    |    |     |    |   |    |    |    |   |    |   |    |    |     |   |   |   |   |    |    |   |   |   |   |       |   |    |   |   |    |    |    |    |    |   |     |   |   |   |   |   |    |    |   |    |   |     |                                                                                                                                                                                                                                                                                                                                                                                                                                                                                                                                                                                                                                                                                                                                                                                                                                                                                                                                                                                                                                                                                                                                                                                                                                                                                           |     |   |   |   |   |   |   |   |   |   |   |       |   |   |   |   |   |   |    |   |    |    |     |    |   |   |    |    |    |   |   |   |    |     |   |    |   |    |    |    |   |   |    |   |     |   |    |   |    |    |    |   |   |    |    |     |    |    |    |   |    |   |   |   |   |   |     |   |   |   |   |    |    |   |   |   |   |     |   |    |    |    |    |    |   |    |    |    |     |    |    |   |   |   |    |   |   |    |    |     |
| 6                                                                                                                                                                                                                                                                                                                                                                                                                                                                                                                                                                                                                                                                                                                                                                                                                                                                                                                                                                                                                                                                                                                                                                                                                                                                                  | 0     | 3     | 5   | 6   | 5   | 4   | 4     | 938 | 3   |   |   |       |   |   |   |   |   |   |   |   |    |   |       |    |    |   |   |    |    |   |   |   |    |     |   |    |   |    |    |   |   |   |   |   |     |   |    |   |   |    |   |   |   |    |    |     |    |   |    |    |    |   |    |   |    |    |     |   |   |   |   |    |    |   |   |   |   |       |   |    |   |   |    |    |    |    |    |   |     |   |   |   |   |   |    |    |   |    |   |     |                                                                                                                                                                                                                                                                                                                                                                                                                                                                                                                                                                                                                                                                                                                                                                                                                                                                                                                                                                                                                                                                                                                                                                                                                                                                                           |     |   |   |   |   |   |   |   |   |   |   |       |   |   |   |   |   |   |    |   |    |    |     |    |   |   |    |    |    |   |   |   |    |     |   |    |   |    |    |    |   |   |    |   |     |   |    |   |    |    |    |   |   |    |    |     |    |    |    |   |    |   |   |   |   |   |     |   |   |   |   |    |    |   |   |   |   |     |   |    |    |    |    |    |   |    |    |    |     |    |    |   |   |   |    |   |   |    |    |     |
| 3                                                                                                                                                                                                                                                                                                                                                                                                                                                                                                                                                                                                                                                                                                                                                                                                                                                                                                                                                                                                                                                                                                                                                                                                                                                                                  | 2     | 0     | 6   | 13  | 2   | 1   | 7     | 6   | 969 |   |   |       |   |   |   |   |   |   |   |   |    |   |       |    |    |   |   |    |    |   |   |   |    |     |   |    |   |    |    |   |   |   |   |   |     |   |    |   |   |    |   |   |   |    |    |     |    |   |    |    |    |   |    |   |    |    |     |   |   |   |   |    |    |   |   |   |   |       |   |    |   |   |    |    |    |    |    |   |     |   |   |   |   |   |    |    |   |    |   |     |                                                                                                                                                                                                                                                                                                                                                                                                                                                                                                                                                                                                                                                                                                                                                                                                                                                                                                                                                                                                                                                                                                                                                                                                                                                                                           |     |   |   |   |   |   |   |   |   |   |   |       |   |   |   |   |   |   |    |   |    |    |     |    |   |   |    |    |    |   |   |   |    |     |   |    |   |    |    |    |   |   |    |   |     |   |    |   |    |    |    |   |   |    |    |     |    |    |    |   |    |   |   |   |   |   |     |   |   |   |   |    |    |   |   |   |   |     |   |    |    |    |    |    |   |    |    |    |     |    |    |   |   |   |    |   |   |    |    |     |
| 967                                                                                                                                                                                                                                                                                                                                                                                                                                                                                                                                                                                                                                                                                                                                                                                                                                                                                                                                                                                                                                                                                                                                                                                                                                                                                | 0     | 1     | 1   | 0   | 3   | 4   | 1     | 1   | 2   |   |   |       |   |   |   |   |   |   |   |   |    |   |       |    |    |   |   |    |    |   |   |   |    |     |   |    |   |    |    |   |   |   |   |   |     |   |    |   |   |    |   |   |   |    |    |     |    |   |    |    |    |   |    |   |    |    |     |   |   |   |   |    |    |   |   |   |   |       |   |    |   |   |    |    |    |    |    |   |     |   |   |   |   |   |    |    |   |    |   |     |                                                                                                                                                                                                                                                                                                                                                                                                                                                                                                                                                                                                                                                                                                                                                                                                                                                                                                                                                                                                                                                                                                                                                                                                                                                                                           |     |   |   |   |   |   |   |   |   |   |   |       |   |   |   |   |   |   |    |   |    |    |     |    |   |   |    |    |    |   |   |   |    |     |   |    |   |    |    |    |   |   |    |   |     |   |    |   |    |    |    |   |   |    |    |     |    |    |    |   |    |   |   |   |   |   |     |   |   |   |   |    |    |   |   |   |   |     |   |    |    |    |    |    |   |    |    |    |     |    |    |   |   |   |    |   |   |    |    |     |
| 0                                                                                                                                                                                                                                                                                                                                                                                                                                                                                                                                                                                                                                                                                                                                                                                                                                                                                                                                                                                                                                                                                                                                                                                                                                                                                  | 1,122 | 2     | 1   | 0   | 1   | 5   | 1     | 3   | 0   |   |   |       |   |   |   |   |   |   |   |   |    |   |       |    |    |   |   |    |    |   |   |   |    |     |   |    |   |    |    |   |   |   |   |   |     |   |    |   |   |    |   |   |   |    |    |     |    |   |    |    |    |   |    |   |    |    |     |   |   |   |   |    |    |   |   |   |   |       |   |    |   |   |    |    |    |    |    |   |     |   |   |   |   |   |    |    |   |    |   |     |                                                                                                                                                                                                                                                                                                                                                                                                                                                                                                                                                                                                                                                                                                                                                                                                                                                                                                                                                                                                                                                                                                                                                                                                                                                                                           |     |   |   |   |   |   |   |   |   |   |   |       |   |   |   |   |   |   |    |   |    |    |     |    |   |   |    |    |    |   |   |   |    |     |   |    |   |    |    |    |   |   |    |   |     |   |    |   |    |    |    |   |   |    |    |     |    |    |    |   |    |   |   |   |   |   |     |   |   |   |   |    |    |   |   |   |   |     |   |    |    |    |    |    |   |    |    |    |     |    |    |   |   |   |    |   |   |    |    |     |
| 5                                                                                                                                                                                                                                                                                                                                                                                                                                                                                                                                                                                                                                                                                                                                                                                                                                                                                                                                                                                                                                                                                                                                                                                                                                                                                  | 2     | 998   | 6   | 3   | 1   | 4   | 8     | 5   | 0   |   |   |       |   |   |   |   |   |   |   |   |    |   |       |    |    |   |   |    |    |   |   |   |    |     |   |    |   |    |    |   |   |   |   |   |     |   |    |   |   |    |   |   |   |    |    |     |    |   |    |    |    |   |    |   |    |    |     |   |   |   |   |    |    |   |   |   |   |       |   |    |   |   |    |    |    |    |    |   |     |   |   |   |   |   |    |    |   |    |   |     |                                                                                                                                                                                                                                                                                                                                                                                                                                                                                                                                                                                                                                                                                                                                                                                                                                                                                                                                                                                                                                                                                                                                                                                                                                                                                           |     |   |   |   |   |   |   |   |   |   |   |       |   |   |   |   |   |   |    |   |    |    |     |    |   |   |    |    |    |   |   |   |    |     |   |    |   |    |    |    |   |   |    |   |     |   |    |   |    |    |    |   |   |    |    |     |    |    |    |   |    |   |   |   |   |   |     |   |   |   |   |    |    |   |   |   |   |     |   |    |    |    |    |    |   |    |    |    |     |    |    |   |   |   |    |   |   |    |    |     |
| 0                                                                                                                                                                                                                                                                                                                                                                                                                                                                                                                                                                                                                                                                                                                                                                                                                                                                                                                                                                                                                                                                                                                                                                                                                                                                                  | 0     | 6     | 983 | 0   | 5   | 1   | 7     | 5   | 3   |   |   |       |   |   |   |   |   |   |   |   |    |   |       |    |    |   |   |    |    |   |   |   |    |     |   |    |   |    |    |   |   |   |   |   |     |   |    |   |   |    |   |   |   |    |    |     |    |   |    |    |    |   |    |   |    |    |     |   |   |   |   |    |    |   |   |   |   |       |   |    |   |   |    |    |    |    |    |   |     |   |   |   |   |   |    |    |   |    |   |     |                                                                                                                                                                                                                                                                                                                                                                                                                                                                                                                                                                                                                                                                                                                                                                                                                                                                                                                                                                                                                                                                                                                                                                                                                                                                                           |     |   |   |   |   |   |   |   |   |   |   |       |   |   |   |   |   |   |    |   |    |    |     |    |   |   |    |    |    |   |   |   |    |     |   |    |   |    |    |    |   |   |    |   |     |   |    |   |    |    |    |   |   |    |    |     |    |    |    |   |    |   |   |   |   |   |     |   |   |   |   |    |    |   |   |   |   |     |   |    |    |    |    |    |   |    |    |    |     |    |    |   |   |   |    |   |   |    |    |     |
| 2                                                                                                                                                                                                                                                                                                                                                                                                                                                                                                                                                                                                                                                                                                                                                                                                                                                                                                                                                                                                                                                                                                                                                                                                                                                                                  | 0     | 3     | 1   | 950 | 0   | 5   | 2     | 2   | 17  |   |   |       |   |   |   |   |   |   |   |   |    |   |       |    |    |   |   |    |    |   |   |   |    |     |   |    |   |    |    |   |   |   |   |   |     |   |    |   |   |    |   |   |   |    |    |     |    |   |    |    |    |   |    |   |    |    |     |   |   |   |   |    |    |   |   |   |   |       |   |    |   |   |    |    |    |    |    |   |     |   |   |   |   |   |    |    |   |    |   |     |                                                                                                                                                                                                                                                                                                                                                                                                                                                                                                                                                                                                                                                                                                                                                                                                                                                                                                                                                                                                                                                                                                                                                                                                                                                                                           |     |   |   |   |   |   |   |   |   |   |   |       |   |   |   |   |   |   |    |   |    |    |     |    |   |   |    |    |    |   |   |   |    |     |   |    |   |    |    |    |   |   |    |   |     |   |    |   |    |    |    |   |   |    |    |     |    |    |    |   |    |   |   |   |   |   |     |   |   |   |   |    |    |   |   |   |   |     |   |    |    |    |    |    |   |    |    |    |     |    |    |   |   |   |    |   |   |    |    |     |
| 5                                                                                                                                                                                                                                                                                                                                                                                                                                                                                                                                                                                                                                                                                                                                                                                                                                                                                                                                                                                                                                                                                                                                                                                                                                                                                  | 1     | 0     | 13  | 1   | 853 | 9   | 1     | 6   | 3   |   |   |       |   |   |   |   |   |   |   |   |    |   |       |    |    |   |   |    |    |   |   |   |    |     |   |    |   |    |    |   |   |   |   |   |     |   |    |   |   |    |   |   |   |    |    |     |    |   |    |    |    |   |    |   |    |    |     |   |   |   |   |    |    |   |   |   |   |       |   |    |   |   |    |    |    |    |    |   |     |   |   |   |   |   |    |    |   |    |   |     |                                                                                                                                                                                                                                                                                                                                                                                                                                                                                                                                                                                                                                                                                                                                                                                                                                                                                                                                                                                                                                                                                                                                                                                                                                                                                           |     |   |   |   |   |   |   |   |   |   |   |       |   |   |   |   |   |   |    |   |    |    |     |    |   |   |    |    |    |   |   |   |    |     |   |    |   |    |    |    |   |   |    |   |     |   |    |   |    |    |    |   |   |    |    |     |    |    |    |   |    |   |   |   |   |   |     |   |   |   |   |    |    |   |   |   |   |     |   |    |    |    |    |    |   |    |    |    |     |    |    |   |   |   |    |   |   |    |    |     |
| 5                                                                                                                                                                                                                                                                                                                                                                                                                                                                                                                                                                                                                                                                                                                                                                                                                                                                                                                                                                                                                                                                                                                                                                                                                                                                                  | 3     | 1     | 1   | 7   | 5   | 936 | 0     | 0   | 0   |   |   |       |   |   |   |   |   |   |   |   |    |   |       |    |    |   |   |    |    |   |   |   |    |     |   |    |   |    |    |   |   |   |   |   |     |   |    |   |   |    |   |   |   |    |    |     |    |   |    |    |    |   |    |   |    |    |     |   |   |   |   |    |    |   |   |   |   |       |   |    |   |   |    |    |    |    |    |   |     |   |   |   |   |   |    |    |   |    |   |     |                                                                                                                                                                                                                                                                                                                                                                                                                                                                                                                                                                                                                                                                                                                                                                                                                                                                                                                                                                                                                                                                                                                                                                                                                                                                                           |     |   |   |   |   |   |   |   |   |   |   |       |   |   |   |   |   |   |    |   |    |    |     |    |   |   |    |    |    |   |   |   |    |     |   |    |   |    |    |    |   |   |    |   |     |   |    |   |    |    |    |   |   |    |    |     |    |    |    |   |    |   |   |   |   |   |     |   |   |   |   |    |    |   |   |   |   |     |   |    |    |    |    |    |   |    |    |    |     |    |    |   |   |   |    |   |   |    |    |     |
| 1                                                                                                                                                                                                                                                                                                                                                                                                                                                                                                                                                                                                                                                                                                                                                                                                                                                                                                                                                                                                                                                                                                                                                                                                                                                                                  | 9     | 10    | 4   | 3   | 1   | 0   | 991   | 0   | 9   |   |   |       |   |   |   |   |   |   |   |   |    |   |       |    |    |   |   |    |    |   |   |   |    |     |   |    |   |    |    |   |   |   |   |   |     |   |    |   |   |    |   |   |   |    |    |     |    |   |    |    |    |   |    |   |    |    |     |   |   |   |   |    |    |   |   |   |   |       |   |    |   |   |    |    |    |    |    |   |     |   |   |   |   |   |    |    |   |    |   |     |                                                                                                                                                                                                                                                                                                                                                                                                                                                                                                                                                                                                                                                                                                                                                                                                                                                                                                                                                                                                                                                                                                                                                                                                                                                                                           |     |   |   |   |   |   |   |   |   |   |   |       |   |   |   |   |   |   |    |   |    |    |     |    |   |   |    |    |    |   |   |   |    |     |   |    |   |    |    |    |   |   |    |   |     |   |    |   |    |    |    |   |   |    |    |     |    |    |    |   |    |   |   |   |   |   |     |   |   |   |   |    |    |   |   |   |   |     |   |    |    |    |    |    |   |    |    |    |     |    |    |   |   |   |    |   |   |    |    |     |
| 3                                                                                                                                                                                                                                                                                                                                                                                                                                                                                                                                                                                                                                                                                                                                                                                                                                                                                                                                                                                                                                                                                                                                                                                                                                                                                  | 2     | 5     | 7   | 5   | 7   | 3   | 4     | 938 | 0   |   |   |       |   |   |   |   |   |   |   |   |    |   |       |    |    |   |   |    |    |   |   |   |    |     |   |    |   |    |    |   |   |   |   |   |     |   |    |   |   |    |   |   |   |    |    |     |    |   |    |    |    |   |    |   |    |    |     |   |   |   |   |    |    |   |   |   |   |       |   |    |   |   |    |    |    |    |    |   |     |   |   |   |   |   |    |    |   |    |   |     |                                                                                                                                                                                                                                                                                                                                                                                                                                                                                                                                                                                                                                                                                                                                                                                                                                                                                                                                                                                                                                                                                                                                                                                                                                                                                           |     |   |   |   |   |   |   |   |   |   |   |       |   |   |   |   |   |   |    |   |    |    |     |    |   |   |    |    |    |   |   |   |    |     |   |    |   |    |    |    |   |   |    |   |     |   |    |   |    |    |    |   |   |    |    |     |    |    |    |   |    |   |   |   |   |   |     |   |   |   |   |    |    |   |   |   |   |     |   |    |    |    |    |    |   |    |    |    |     |    |    |   |   |   |    |   |   |    |    |     |
| 4                                                                                                                                                                                                                                                                                                                                                                                                                                                                                                                                                                                                                                                                                                                                                                                                                                                                                                                                                                                                                                                                                                                                                                                                                                                                                  | 5     | 1     | 7   | 17  | 2   | 1   | 5     | 3   | 964 |   |   |       |   |   |   |   |   |   |   |   |    |   |       |    |    |   |   |    |    |   |   |   |    |     |   |    |   |    |    |   |   |   |   |   |     |   |    |   |   |    |   |   |   |    |    |     |    |   |    |    |    |   |    |   |    |    |     |   |   |   |   |    |    |   |   |   |   |       |   |    |   |   |    |    |    |    |    |   |     |   |   |   |   |   |    |    |   |    |   |     |                                                                                                                                                                                                                                                                                                                                                                                                                                                                                                                                                                                                                                                                                                                                                                                                                                                                                                                                                                                                                                                                                                                                                                                                                                                                                           |     |   |   |   |   |   |   |   |   |   |   |       |   |   |   |   |   |   |    |   |    |    |     |    |   |   |    |    |    |   |   |   |    |     |   |    |   |    |    |    |   |   |    |   |     |   |    |   |    |    |    |   |   |    |    |     |    |    |    |   |    |   |   |   |   |   |     |   |   |   |   |    |    |   |   |   |   |     |   |    |    |    |    |    |   |    |    |    |     |    |    |   |   |   |    |   |   |    |    |     |
| <table border="1"> <tbody> <tr><td>960</td><td>0</td><td>1</td><td>1</td><td>0</td><td>7</td><td>8</td><td>1</td><td>2</td><td>0</td></tr> <tr><td>0</td><td>1,112</td><td>5</td><td>3</td><td>0</td><td>2</td><td>3</td><td>1</td><td>9</td><td>0</td></tr> <tr><td>10</td><td>3</td><td>935</td><td>26</td><td>11</td><td>3</td><td>8</td><td>13</td><td>20</td><td>3</td></tr> <tr><td>5</td><td>1</td><td>15</td><td>917</td><td>1</td><td>28</td><td>1</td><td>12</td><td>22</td><td>8</td></tr> <tr><td>1</td><td>5</td><td>7</td><td>1</td><td>903</td><td>0</td><td>15</td><td>3</td><td>4</td><td>43</td></tr> <tr><td>9</td><td>4</td><td>6</td><td>33</td><td>10</td><td>778</td><td>12</td><td>6</td><td>18</td><td>16</td></tr> <tr><td>24</td><td>1</td><td>14</td><td>0</td><td>13</td><td>14</td><td>889</td><td>0</td><td>3</td><td>0</td></tr> <tr><td>1</td><td>17</td><td>25</td><td>6</td><td>7</td><td>0</td><td>0</td><td>946</td><td>2</td><td>24</td></tr> <tr><td>6</td><td>8</td><td>15</td><td>21</td><td>16</td><td>16</td><td>12</td><td>6</td><td>867</td><td>7</td></tr> <tr><td>5</td><td>9</td><td>1</td><td>8</td><td>34</td><td>13</td><td>1</td><td>26</td><td>6</td><td>906</td></tr> </tbody> </table> <p style="text-align: center;">C</p> | 960   | 0     | 1   | 1   | 0   | 7   | 8     | 1   | 2   | 0 | 0 | 1,112 | 5 | 3 | 0 | 2 | 3 | 1 | 9 | 0 | 10 | 3 | 935   | 26 | 11 | 3 | 8 | 13 | 20 | 3 | 5 | 1 | 15 | 917 | 1 | 28 | 1 | 12 | 22 | 8 | 1 | 5 | 7 | 1 | 903 | 0 | 15 | 3 | 4 | 43 | 9 | 4 | 6 | 33 | 10 | 778 | 12 | 6 | 18 | 16 | 24 | 1 | 14 | 0 | 13 | 14 | 889 | 0 | 3 | 0 | 1 | 17 | 25 | 6 | 7 | 0 | 0 | 946   | 2 | 24 | 6 | 8 | 15 | 21 | 16 | 16 | 12 | 6 | 867 | 7 | 5 | 9 | 1 | 8 | 34 | 13 | 1 | 26 | 6 | 906 | <table border="1"> <tbody> <tr><td>967</td><td>0</td><td>0</td><td>1</td><td>0</td><td>2</td><td>8</td><td>1</td><td>1</td><td>0</td></tr> <tr><td>0</td><td>1,107</td><td>4</td><td>2</td><td>0</td><td>1</td><td>4</td><td>2</td><td>15</td><td>0</td></tr> <tr><td>14</td><td>12</td><td>901</td><td>10</td><td>9</td><td>2</td><td>19</td><td>18</td><td>42</td><td>5</td></tr> <tr><td>6</td><td>2</td><td>30</td><td>875</td><td>0</td><td>33</td><td>4</td><td>24</td><td>26</td><td>10</td></tr> <tr><td>4</td><td>1</td><td>12</td><td>0</td><td>888</td><td>0</td><td>11</td><td>3</td><td>12</td><td>51</td></tr> <tr><td>17</td><td>8</td><td>8</td><td>41</td><td>11</td><td>724</td><td>24</td><td>13</td><td>37</td><td>9</td></tr> <tr><td>11</td><td>3</td><td>6</td><td>0</td><td>7</td><td>6</td><td>921</td><td>1</td><td>3</td><td>0</td></tr> <tr><td>3</td><td>10</td><td>31</td><td>2</td><td>3</td><td>0</td><td>0</td><td>949</td><td>3</td><td>27</td></tr> <tr><td>12</td><td>12</td><td>13</td><td>17</td><td>9</td><td>26</td><td>18</td><td>15</td><td>841</td><td>10</td></tr> <tr><td>10</td><td>8</td><td>2</td><td>7</td><td>39</td><td>6</td><td>1</td><td>47</td><td>10</td><td>879</td></tr> </tbody> </table> <p style="text-align: center;">D</p> | 967 | 0 | 0 | 1 | 0 | 2 | 8 | 1 | 1 | 0 | 0 | 1,107 | 4 | 2 | 0 | 1 | 4 | 2 | 15 | 0 | 14 | 12 | 901 | 10 | 9 | 2 | 19 | 18 | 42 | 5 | 6 | 2 | 30 | 875 | 0 | 33 | 4 | 24 | 26 | 10 | 4 | 1 | 12 | 0 | 888 | 0 | 11 | 3 | 12 | 51 | 17 | 8 | 8 | 41 | 11 | 724 | 24 | 13 | 37 | 9 | 11 | 3 | 6 | 0 | 7 | 6 | 921 | 1 | 3 | 0 | 3 | 10 | 31 | 2 | 3 | 0 | 0 | 949 | 3 | 27 | 12 | 12 | 13 | 17 | 9 | 26 | 18 | 15 | 841 | 10 | 10 | 8 | 2 | 7 | 39 | 6 | 1 | 47 | 10 | 879 |
| 960                                                                                                                                                                                                                                                                                                                                                                                                                                                                                                                                                                                                                                                                                                                                                                                                                                                                                                                                                                                                                                                                                                                                                                                                                                                                                | 0     | 1     | 1   | 0   | 7   | 8   | 1     | 2   | 0   |   |   |       |   |   |   |   |   |   |   |   |    |   |       |    |    |   |   |    |    |   |   |   |    |     |   |    |   |    |    |   |   |   |   |   |     |   |    |   |   |    |   |   |   |    |    |     |    |   |    |    |    |   |    |   |    |    |     |   |   |   |   |    |    |   |   |   |   |       |   |    |   |   |    |    |    |    |    |   |     |   |   |   |   |   |    |    |   |    |   |     |                                                                                                                                                                                                                                                                                                                                                                                                                                                                                                                                                                                                                                                                                                                                                                                                                                                                                                                                                                                                                                                                                                                                                                                                                                                                                           |     |   |   |   |   |   |   |   |   |   |   |       |   |   |   |   |   |   |    |   |    |    |     |    |   |   |    |    |    |   |   |   |    |     |   |    |   |    |    |    |   |   |    |   |     |   |    |   |    |    |    |   |   |    |    |     |    |    |    |   |    |   |   |   |   |   |     |   |   |   |   |    |    |   |   |   |   |     |   |    |    |    |    |    |   |    |    |    |     |    |    |   |   |   |    |   |   |    |    |     |
| 0                                                                                                                                                                                                                                                                                                                                                                                                                                                                                                                                                                                                                                                                                                                                                                                                                                                                                                                                                                                                                                                                                                                                                                                                                                                                                  | 1,112 | 5     | 3   | 0   | 2   | 3   | 1     | 9   | 0   |   |   |       |   |   |   |   |   |   |   |   |    |   |       |    |    |   |   |    |    |   |   |   |    |     |   |    |   |    |    |   |   |   |   |   |     |   |    |   |   |    |   |   |   |    |    |     |    |   |    |    |    |   |    |   |    |    |     |   |   |   |   |    |    |   |   |   |   |       |   |    |   |   |    |    |    |    |    |   |     |   |   |   |   |   |    |    |   |    |   |     |                                                                                                                                                                                                                                                                                                                                                                                                                                                                                                                                                                                                                                                                                                                                                                                                                                                                                                                                                                                                                                                                                                                                                                                                                                                                                           |     |   |   |   |   |   |   |   |   |   |   |       |   |   |   |   |   |   |    |   |    |    |     |    |   |   |    |    |    |   |   |   |    |     |   |    |   |    |    |    |   |   |    |   |     |   |    |   |    |    |    |   |   |    |    |     |    |    |    |   |    |   |   |   |   |   |     |   |   |   |   |    |    |   |   |   |   |     |   |    |    |    |    |    |   |    |    |    |     |    |    |   |   |   |    |   |   |    |    |     |
| 10                                                                                                                                                                                                                                                                                                                                                                                                                                                                                                                                                                                                                                                                                                                                                                                                                                                                                                                                                                                                                                                                                                                                                                                                                                                                                 | 3     | 935   | 26  | 11  | 3   | 8   | 13    | 20  | 3   |   |   |       |   |   |   |   |   |   |   |   |    |   |       |    |    |   |   |    |    |   |   |   |    |     |   |    |   |    |    |   |   |   |   |   |     |   |    |   |   |    |   |   |   |    |    |     |    |   |    |    |    |   |    |   |    |    |     |   |   |   |   |    |    |   |   |   |   |       |   |    |   |   |    |    |    |    |    |   |     |   |   |   |   |   |    |    |   |    |   |     |                                                                                                                                                                                                                                                                                                                                                                                                                                                                                                                                                                                                                                                                                                                                                                                                                                                                                                                                                                                                                                                                                                                                                                                                                                                                                           |     |   |   |   |   |   |   |   |   |   |   |       |   |   |   |   |   |   |    |   |    |    |     |    |   |   |    |    |    |   |   |   |    |     |   |    |   |    |    |    |   |   |    |   |     |   |    |   |    |    |    |   |   |    |    |     |    |    |    |   |    |   |   |   |   |   |     |   |   |   |   |    |    |   |   |   |   |     |   |    |    |    |    |    |   |    |    |    |     |    |    |   |   |   |    |   |   |    |    |     |
| 5                                                                                                                                                                                                                                                                                                                                                                                                                                                                                                                                                                                                                                                                                                                                                                                                                                                                                                                                                                                                                                                                                                                                                                                                                                                                                  | 1     | 15    | 917 | 1   | 28  | 1   | 12    | 22  | 8   |   |   |       |   |   |   |   |   |   |   |   |    |   |       |    |    |   |   |    |    |   |   |   |    |     |   |    |   |    |    |   |   |   |   |   |     |   |    |   |   |    |   |   |   |    |    |     |    |   |    |    |    |   |    |   |    |    |     |   |   |   |   |    |    |   |   |   |   |       |   |    |   |   |    |    |    |    |    |   |     |   |   |   |   |   |    |    |   |    |   |     |                                                                                                                                                                                                                                                                                                                                                                                                                                                                                                                                                                                                                                                                                                                                                                                                                                                                                                                                                                                                                                                                                                                                                                                                                                                                                           |     |   |   |   |   |   |   |   |   |   |   |       |   |   |   |   |   |   |    |   |    |    |     |    |   |   |    |    |    |   |   |   |    |     |   |    |   |    |    |    |   |   |    |   |     |   |    |   |    |    |    |   |   |    |    |     |    |    |    |   |    |   |   |   |   |   |     |   |   |   |   |    |    |   |   |   |   |     |   |    |    |    |    |    |   |    |    |    |     |    |    |   |   |   |    |   |   |    |    |     |
| 1                                                                                                                                                                                                                                                                                                                                                                                                                                                                                                                                                                                                                                                                                                                                                                                                                                                                                                                                                                                                                                                                                                                                                                                                                                                                                  | 5     | 7     | 1   | 903 | 0   | 15  | 3     | 4   | 43  |   |   |       |   |   |   |   |   |   |   |   |    |   |       |    |    |   |   |    |    |   |   |   |    |     |   |    |   |    |    |   |   |   |   |   |     |   |    |   |   |    |   |   |   |    |    |     |    |   |    |    |    |   |    |   |    |    |     |   |   |   |   |    |    |   |   |   |   |       |   |    |   |   |    |    |    |    |    |   |     |   |   |   |   |   |    |    |   |    |   |     |                                                                                                                                                                                                                                                                                                                                                                                                                                                                                                                                                                                                                                                                                                                                                                                                                                                                                                                                                                                                                                                                                                                                                                                                                                                                                           |     |   |   |   |   |   |   |   |   |   |   |       |   |   |   |   |   |   |    |   |    |    |     |    |   |   |    |    |    |   |   |   |    |     |   |    |   |    |    |    |   |   |    |   |     |   |    |   |    |    |    |   |   |    |    |     |    |    |    |   |    |   |   |   |   |   |     |   |   |   |   |    |    |   |   |   |   |     |   |    |    |    |    |    |   |    |    |    |     |    |    |   |   |   |    |   |   |    |    |     |
| 9                                                                                                                                                                                                                                                                                                                                                                                                                                                                                                                                                                                                                                                                                                                                                                                                                                                                                                                                                                                                                                                                                                                                                                                                                                                                                  | 4     | 6     | 33  | 10  | 778 | 12  | 6     | 18  | 16  |   |   |       |   |   |   |   |   |   |   |   |    |   |       |    |    |   |   |    |    |   |   |   |    |     |   |    |   |    |    |   |   |   |   |   |     |   |    |   |   |    |   |   |   |    |    |     |    |   |    |    |    |   |    |   |    |    |     |   |   |   |   |    |    |   |   |   |   |       |   |    |   |   |    |    |    |    |    |   |     |   |   |   |   |   |    |    |   |    |   |     |                                                                                                                                                                                                                                                                                                                                                                                                                                                                                                                                                                                                                                                                                                                                                                                                                                                                                                                                                                                                                                                                                                                                                                                                                                                                                           |     |   |   |   |   |   |   |   |   |   |   |       |   |   |   |   |   |   |    |   |    |    |     |    |   |   |    |    |    |   |   |   |    |     |   |    |   |    |    |    |   |   |    |   |     |   |    |   |    |    |    |   |   |    |    |     |    |    |    |   |    |   |   |   |   |   |     |   |   |   |   |    |    |   |   |   |   |     |   |    |    |    |    |    |   |    |    |    |     |    |    |   |   |   |    |   |   |    |    |     |
| 24                                                                                                                                                                                                                                                                                                                                                                                                                                                                                                                                                                                                                                                                                                                                                                                                                                                                                                                                                                                                                                                                                                                                                                                                                                                                                 | 1     | 14    | 0   | 13  | 14  | 889 | 0     | 3   | 0   |   |   |       |   |   |   |   |   |   |   |   |    |   |       |    |    |   |   |    |    |   |   |   |    |     |   |    |   |    |    |   |   |   |   |   |     |   |    |   |   |    |   |   |   |    |    |     |    |   |    |    |    |   |    |   |    |    |     |   |   |   |   |    |    |   |   |   |   |       |   |    |   |   |    |    |    |    |    |   |     |   |   |   |   |   |    |    |   |    |   |     |                                                                                                                                                                                                                                                                                                                                                                                                                                                                                                                                                                                                                                                                                                                                                                                                                                                                                                                                                                                                                                                                                                                                                                                                                                                                                           |     |   |   |   |   |   |   |   |   |   |   |       |   |   |   |   |   |   |    |   |    |    |     |    |   |   |    |    |    |   |   |   |    |     |   |    |   |    |    |    |   |   |    |   |     |   |    |   |    |    |    |   |   |    |    |     |    |    |    |   |    |   |   |   |   |   |     |   |   |   |   |    |    |   |   |   |   |     |   |    |    |    |    |    |   |    |    |    |     |    |    |   |   |   |    |   |   |    |    |     |
| 1                                                                                                                                                                                                                                                                                                                                                                                                                                                                                                                                                                                                                                                                                                                                                                                                                                                                                                                                                                                                                                                                                                                                                                                                                                                                                  | 17    | 25    | 6   | 7   | 0   | 0   | 946   | 2   | 24  |   |   |       |   |   |   |   |   |   |   |   |    |   |       |    |    |   |   |    |    |   |   |   |    |     |   |    |   |    |    |   |   |   |   |   |     |   |    |   |   |    |   |   |   |    |    |     |    |   |    |    |    |   |    |   |    |    |     |   |   |   |   |    |    |   |   |   |   |       |   |    |   |   |    |    |    |    |    |   |     |   |   |   |   |   |    |    |   |    |   |     |                                                                                                                                                                                                                                                                                                                                                                                                                                                                                                                                                                                                                                                                                                                                                                                                                                                                                                                                                                                                                                                                                                                                                                                                                                                                                           |     |   |   |   |   |   |   |   |   |   |   |       |   |   |   |   |   |   |    |   |    |    |     |    |   |   |    |    |    |   |   |   |    |     |   |    |   |    |    |    |   |   |    |   |     |   |    |   |    |    |    |   |   |    |    |     |    |    |    |   |    |   |   |   |   |   |     |   |   |   |   |    |    |   |   |   |   |     |   |    |    |    |    |    |   |    |    |    |     |    |    |   |   |   |    |   |   |    |    |     |
| 6                                                                                                                                                                                                                                                                                                                                                                                                                                                                                                                                                                                                                                                                                                                                                                                                                                                                                                                                                                                                                                                                                                                                                                                                                                                                                  | 8     | 15    | 21  | 16  | 16  | 12  | 6     | 867 | 7   |   |   |       |   |   |   |   |   |   |   |   |    |   |       |    |    |   |   |    |    |   |   |   |    |     |   |    |   |    |    |   |   |   |   |   |     |   |    |   |   |    |   |   |   |    |    |     |    |   |    |    |    |   |    |   |    |    |     |   |   |   |   |    |    |   |   |   |   |       |   |    |   |   |    |    |    |    |    |   |     |   |   |   |   |   |    |    |   |    |   |     |                                                                                                                                                                                                                                                                                                                                                                                                                                                                                                                                                                                                                                                                                                                                                                                                                                                                                                                                                                                                                                                                                                                                                                                                                                                                                           |     |   |   |   |   |   |   |   |   |   |   |       |   |   |   |   |   |   |    |   |    |    |     |    |   |   |    |    |    |   |   |   |    |     |   |    |   |    |    |    |   |   |    |   |     |   |    |   |    |    |    |   |   |    |    |     |    |    |    |   |    |   |   |   |   |   |     |   |   |   |   |    |    |   |   |   |   |     |   |    |    |    |    |    |   |    |    |    |     |    |    |   |   |   |    |   |   |    |    |     |
| 5                                                                                                                                                                                                                                                                                                                                                                                                                                                                                                                                                                                                                                                                                                                                                                                                                                                                                                                                                                                                                                                                                                                                                                                                                                                                                  | 9     | 1     | 8   | 34  | 13  | 1   | 26    | 6   | 906 |   |   |       |   |   |   |   |   |   |   |   |    |   |       |    |    |   |   |    |    |   |   |   |    |     |   |    |   |    |    |   |   |   |   |   |     |   |    |   |   |    |   |   |   |    |    |     |    |   |    |    |    |   |    |   |    |    |     |   |   |   |   |    |    |   |   |   |   |       |   |    |   |   |    |    |    |    |    |   |     |   |   |   |   |   |    |    |   |    |   |     |                                                                                                                                                                                                                                                                                                                                                                                                                                                                                                                                                                                                                                                                                                                                                                                                                                                                                                                                                                                                                                                                                                                                                                                                                                                                                           |     |   |   |   |   |   |   |   |   |   |   |       |   |   |   |   |   |   |    |   |    |    |     |    |   |   |    |    |    |   |   |   |    |     |   |    |   |    |    |    |   |   |    |   |     |   |    |   |    |    |    |   |   |    |    |     |    |    |    |   |    |   |   |   |   |   |     |   |   |   |   |    |    |   |   |   |   |     |   |    |    |    |    |    |   |    |    |    |     |    |    |   |   |   |    |   |   |    |    |     |
| 967                                                                                                                                                                                                                                                                                                                                                                                                                                                                                                                                                                                                                                                                                                                                                                                                                                                                                                                                                                                                                                                                                                                                                                                                                                                                                | 0     | 0     | 1   | 0   | 2   | 8   | 1     | 1   | 0   |   |   |       |   |   |   |   |   |   |   |   |    |   |       |    |    |   |   |    |    |   |   |   |    |     |   |    |   |    |    |   |   |   |   |   |     |   |    |   |   |    |   |   |   |    |    |     |    |   |    |    |    |   |    |   |    |    |     |   |   |   |   |    |    |   |   |   |   |       |   |    |   |   |    |    |    |    |    |   |     |   |   |   |   |   |    |    |   |    |   |     |                                                                                                                                                                                                                                                                                                                                                                                                                                                                                                                                                                                                                                                                                                                                                                                                                                                                                                                                                                                                                                                                                                                                                                                                                                                                                           |     |   |   |   |   |   |   |   |   |   |   |       |   |   |   |   |   |   |    |   |    |    |     |    |   |   |    |    |    |   |   |   |    |     |   |    |   |    |    |    |   |   |    |   |     |   |    |   |    |    |    |   |   |    |    |     |    |    |    |   |    |   |   |   |   |   |     |   |   |   |   |    |    |   |   |   |   |     |   |    |    |    |    |    |   |    |    |    |     |    |    |   |   |   |    |   |   |    |    |     |
| 0                                                                                                                                                                                                                                                                                                                                                                                                                                                                                                                                                                                                                                                                                                                                                                                                                                                                                                                                                                                                                                                                                                                                                                                                                                                                                  | 1,107 | 4     | 2   | 0   | 1   | 4   | 2     | 15  | 0   |   |   |       |   |   |   |   |   |   |   |   |    |   |       |    |    |   |   |    |    |   |   |   |    |     |   |    |   |    |    |   |   |   |   |   |     |   |    |   |   |    |   |   |   |    |    |     |    |   |    |    |    |   |    |   |    |    |     |   |   |   |   |    |    |   |   |   |   |       |   |    |   |   |    |    |    |    |    |   |     |   |   |   |   |   |    |    |   |    |   |     |                                                                                                                                                                                                                                                                                                                                                                                                                                                                                                                                                                                                                                                                                                                                                                                                                                                                                                                                                                                                                                                                                                                                                                                                                                                                                           |     |   |   |   |   |   |   |   |   |   |   |       |   |   |   |   |   |   |    |   |    |    |     |    |   |   |    |    |    |   |   |   |    |     |   |    |   |    |    |    |   |   |    |   |     |   |    |   |    |    |    |   |   |    |    |     |    |    |    |   |    |   |   |   |   |   |     |   |   |   |   |    |    |   |   |   |   |     |   |    |    |    |    |    |   |    |    |    |     |    |    |   |   |   |    |   |   |    |    |     |
| 14                                                                                                                                                                                                                                                                                                                                                                                                                                                                                                                                                                                                                                                                                                                                                                                                                                                                                                                                                                                                                                                                                                                                                                                                                                                                                 | 12    | 901   | 10  | 9   | 2   | 19  | 18    | 42  | 5   |   |   |       |   |   |   |   |   |   |   |   |    |   |       |    |    |   |   |    |    |   |   |   |    |     |   |    |   |    |    |   |   |   |   |   |     |   |    |   |   |    |   |   |   |    |    |     |    |   |    |    |    |   |    |   |    |    |     |   |   |   |   |    |    |   |   |   |   |       |   |    |   |   |    |    |    |    |    |   |     |   |   |   |   |   |    |    |   |    |   |     |                                                                                                                                                                                                                                                                                                                                                                                                                                                                                                                                                                                                                                                                                                                                                                                                                                                                                                                                                                                                                                                                                                                                                                                                                                                                                           |     |   |   |   |   |   |   |   |   |   |   |       |   |   |   |   |   |   |    |   |    |    |     |    |   |   |    |    |    |   |   |   |    |     |   |    |   |    |    |    |   |   |    |   |     |   |    |   |    |    |    |   |   |    |    |     |    |    |    |   |    |   |   |   |   |   |     |   |   |   |   |    |    |   |   |   |   |     |   |    |    |    |    |    |   |    |    |    |     |    |    |   |   |   |    |   |   |    |    |     |
| 6                                                                                                                                                                                                                                                                                                                                                                                                                                                                                                                                                                                                                                                                                                                                                                                                                                                                                                                                                                                                                                                                                                                                                                                                                                                                                  | 2     | 30    | 875 | 0   | 33  | 4   | 24    | 26  | 10  |   |   |       |   |   |   |   |   |   |   |   |    |   |       |    |    |   |   |    |    |   |   |   |    |     |   |    |   |    |    |   |   |   |   |   |     |   |    |   |   |    |   |   |   |    |    |     |    |   |    |    |    |   |    |   |    |    |     |   |   |   |   |    |    |   |   |   |   |       |   |    |   |   |    |    |    |    |    |   |     |   |   |   |   |   |    |    |   |    |   |     |                                                                                                                                                                                                                                                                                                                                                                                                                                                                                                                                                                                                                                                                                                                                                                                                                                                                                                                                                                                                                                                                                                                                                                                                                                                                                           |     |   |   |   |   |   |   |   |   |   |   |       |   |   |   |   |   |   |    |   |    |    |     |    |   |   |    |    |    |   |   |   |    |     |   |    |   |    |    |    |   |   |    |   |     |   |    |   |    |    |    |   |   |    |    |     |    |    |    |   |    |   |   |   |   |   |     |   |   |   |   |    |    |   |   |   |   |     |   |    |    |    |    |    |   |    |    |    |     |    |    |   |   |   |    |   |   |    |    |     |
| 4                                                                                                                                                                                                                                                                                                                                                                                                                                                                                                                                                                                                                                                                                                                                                                                                                                                                                                                                                                                                                                                                                                                                                                                                                                                                                  | 1     | 12    | 0   | 888 | 0   | 11  | 3     | 12  | 51  |   |   |       |   |   |   |   |   |   |   |   |    |   |       |    |    |   |   |    |    |   |   |   |    |     |   |    |   |    |    |   |   |   |   |   |     |   |    |   |   |    |   |   |   |    |    |     |    |   |    |    |    |   |    |   |    |    |     |   |   |   |   |    |    |   |   |   |   |       |   |    |   |   |    |    |    |    |    |   |     |   |   |   |   |   |    |    |   |    |   |     |                                                                                                                                                                                                                                                                                                                                                                                                                                                                                                                                                                                                                                                                                                                                                                                                                                                                                                                                                                                                                                                                                                                                                                                                                                                                                           |     |   |   |   |   |   |   |   |   |   |   |       |   |   |   |   |   |   |    |   |    |    |     |    |   |   |    |    |    |   |   |   |    |     |   |    |   |    |    |    |   |   |    |   |     |   |    |   |    |    |    |   |   |    |    |     |    |    |    |   |    |   |   |   |   |   |     |   |   |   |   |    |    |   |   |   |   |     |   |    |    |    |    |    |   |    |    |    |     |    |    |   |   |   |    |   |   |    |    |     |
| 17                                                                                                                                                                                                                                                                                                                                                                                                                                                                                                                                                                                                                                                                                                                                                                                                                                                                                                                                                                                                                                                                                                                                                                                                                                                                                 | 8     | 8     | 41  | 11  | 724 | 24  | 13    | 37  | 9   |   |   |       |   |   |   |   |   |   |   |   |    |   |       |    |    |   |   |    |    |   |   |   |    |     |   |    |   |    |    |   |   |   |   |   |     |   |    |   |   |    |   |   |   |    |    |     |    |   |    |    |    |   |    |   |    |    |     |   |   |   |   |    |    |   |   |   |   |       |   |    |   |   |    |    |    |    |    |   |     |   |   |   |   |   |    |    |   |    |   |     |                                                                                                                                                                                                                                                                                                                                                                                                                                                                                                                                                                                                                                                                                                                                                                                                                                                                                                                                                                                                                                                                                                                                                                                                                                                                                           |     |   |   |   |   |   |   |   |   |   |   |       |   |   |   |   |   |   |    |   |    |    |     |    |   |   |    |    |    |   |   |   |    |     |   |    |   |    |    |    |   |   |    |   |     |   |    |   |    |    |    |   |   |    |    |     |    |    |    |   |    |   |   |   |   |   |     |   |   |   |   |    |    |   |   |   |   |     |   |    |    |    |    |    |   |    |    |    |     |    |    |   |   |   |    |   |   |    |    |     |
| 11                                                                                                                                                                                                                                                                                                                                                                                                                                                                                                                                                                                                                                                                                                                                                                                                                                                                                                                                                                                                                                                                                                                                                                                                                                                                                 | 3     | 6     | 0   | 7   | 6   | 921 | 1     | 3   | 0   |   |   |       |   |   |   |   |   |   |   |   |    |   |       |    |    |   |   |    |    |   |   |   |    |     |   |    |   |    |    |   |   |   |   |   |     |   |    |   |   |    |   |   |   |    |    |     |    |   |    |    |    |   |    |   |    |    |     |   |   |   |   |    |    |   |   |   |   |       |   |    |   |   |    |    |    |    |    |   |     |   |   |   |   |   |    |    |   |    |   |     |                                                                                                                                                                                                                                                                                                                                                                                                                                                                                                                                                                                                                                                                                                                                                                                                                                                                                                                                                                                                                                                                                                                                                                                                                                                                                           |     |   |   |   |   |   |   |   |   |   |   |       |   |   |   |   |   |   |    |   |    |    |     |    |   |   |    |    |    |   |   |   |    |     |   |    |   |    |    |    |   |   |    |   |     |   |    |   |    |    |    |   |   |    |    |     |    |    |    |   |    |   |   |   |   |   |     |   |   |   |   |    |    |   |   |   |   |     |   |    |    |    |    |    |   |    |    |    |     |    |    |   |   |   |    |   |   |    |    |     |
| 3                                                                                                                                                                                                                                                                                                                                                                                                                                                                                                                                                                                                                                                                                                                                                                                                                                                                                                                                                                                                                                                                                                                                                                                                                                                                                  | 10    | 31    | 2   | 3   | 0   | 0   | 949   | 3   | 27  |   |   |       |   |   |   |   |   |   |   |   |    |   |       |    |    |   |   |    |    |   |   |   |    |     |   |    |   |    |    |   |   |   |   |   |     |   |    |   |   |    |   |   |   |    |    |     |    |   |    |    |    |   |    |   |    |    |     |   |   |   |   |    |    |   |   |   |   |       |   |    |   |   |    |    |    |    |    |   |     |   |   |   |   |   |    |    |   |    |   |     |                                                                                                                                                                                                                                                                                                                                                                                                                                                                                                                                                                                                                                                                                                                                                                                                                                                                                                                                                                                                                                                                                                                                                                                                                                                                                           |     |   |   |   |   |   |   |   |   |   |   |       |   |   |   |   |   |   |    |   |    |    |     |    |   |   |    |    |    |   |   |   |    |     |   |    |   |    |    |    |   |   |    |   |     |   |    |   |    |    |    |   |   |    |    |     |    |    |    |   |    |   |   |   |   |   |     |   |   |   |   |    |    |   |   |   |   |     |   |    |    |    |    |    |   |    |    |    |     |    |    |   |   |   |    |   |   |    |    |     |
| 12                                                                                                                                                                                                                                                                                                                                                                                                                                                                                                                                                                                                                                                                                                                                                                                                                                                                                                                                                                                                                                                                                                                                                                                                                                                                                 | 12    | 13    | 17  | 9   | 26  | 18  | 15    | 841 | 10  |   |   |       |   |   |   |   |   |   |   |   |    |   |       |    |    |   |   |    |    |   |   |   |    |     |   |    |   |    |    |   |   |   |   |   |     |   |    |   |   |    |   |   |   |    |    |     |    |   |    |    |    |   |    |   |    |    |     |   |   |   |   |    |    |   |   |   |   |       |   |    |   |   |    |    |    |    |    |   |     |   |   |   |   |   |    |    |   |    |   |     |                                                                                                                                                                                                                                                                                                                                                                                                                                                                                                                                                                                                                                                                                                                                                                                                                                                                                                                                                                                                                                                                                                                                                                                                                                                                                           |     |   |   |   |   |   |   |   |   |   |   |       |   |   |   |   |   |   |    |   |    |    |     |    |   |   |    |    |    |   |   |   |    |     |   |    |   |    |    |    |   |   |    |   |     |   |    |   |    |    |    |   |   |    |    |     |    |    |    |   |    |   |   |   |   |   |     |   |   |   |   |    |    |   |   |   |   |     |   |    |    |    |    |    |   |    |    |    |     |    |    |   |   |   |    |   |   |    |    |     |
| 10                                                                                                                                                                                                                                                                                                                                                                                                                                                                                                                                                                                                                                                                                                                                                                                                                                                                                                                                                                                                                                                                                                                                                                                                                                                                                 | 8     | 2     | 7   | 39  | 6   | 1   | 47    | 10  | 879 |   |   |       |   |   |   |   |   |   |   |   |    |   |       |    |    |   |   |    |    |   |   |   |    |     |   |    |   |    |    |   |   |   |   |   |     |   |    |   |   |    |   |   |   |    |    |     |    |   |    |    |    |   |    |   |    |    |     |   |   |   |   |    |    |   |   |   |   |       |   |    |   |   |    |    |    |    |    |   |     |   |   |   |   |   |    |    |   |    |   |     |                                                                                                                                                                                                                                                                                                                                                                                                                                                                                                                                                                                                                                                                                                                                                                                                                                                                                                                                                                                                                                                                                                                                                                                                                                                                                           |     |   |   |   |   |   |   |   |   |   |   |       |   |   |   |   |   |   |    |   |    |    |     |    |   |   |    |    |    |   |   |   |    |     |   |    |   |    |    |    |   |   |    |   |     |   |    |   |    |    |    |   |   |    |    |     |    |    |    |   |    |   |   |   |   |   |     |   |   |   |   |    |    |   |   |   |   |     |   |    |    |    |    |    |   |    |    |    |     |    |    |   |   |   |    |   |   |    |    |     |

---

|     |       |     |     |     |     |     |     |     |     |
|-----|-------|-----|-----|-----|-----|-----|-----|-----|-----|
| 957 | 0     | 2   | 3   | 0   | 3   | 14  | 1   | 0   | 0   |
| 0   | 1,078 | 7   | 4   | 0   | 2   | 4   | 1   | 39  | 0   |
| 19  | 10    | 899 | 8   | 7   | 2   | 34  | 9   | 33  | 11  |
| 8   | 2     | 29  | 883 | 1   | 23  | 4   | 18  | 35  | 7   |
| 5   | 0     | 2   | 0   | 863 | 1   | 39  | 5   | 8   | 59  |
| 30  | 9     | 2   | 65  | 7   | 682 | 30  | 17  | 41  | 9   |
| 10  | 3     | 4   | 1   | 9   | 9   | 917 | 1   | 4   | 0   |
| 2   | 18    | 30  | 5   | 7   | 0   | 0   | 931 | 4   | 31  |
| 20  | 6     | 7   | 24  | 9   | 28  | 22  | 10  | 835 | 13  |
| 15  | 8     | 0   | 10  | 49  | 7   | 2   | 46  | 12  | 860 |

E
