# Supplementary material for: Federated Learning on Clinical Benchmark Data: Performance Assessment
Source: PubMed Central journal article supplement (PMC7652692; doi:10.2196/20891), 2020-10-26

**Multimedia Appendix 3.** Accuracy changes for each round of MNIST federated learning (FL) experiments. (A). Basic FL. (B) Imbalanced FL. (C) Skewed FL. (D) Imbalanced and skewed FL.

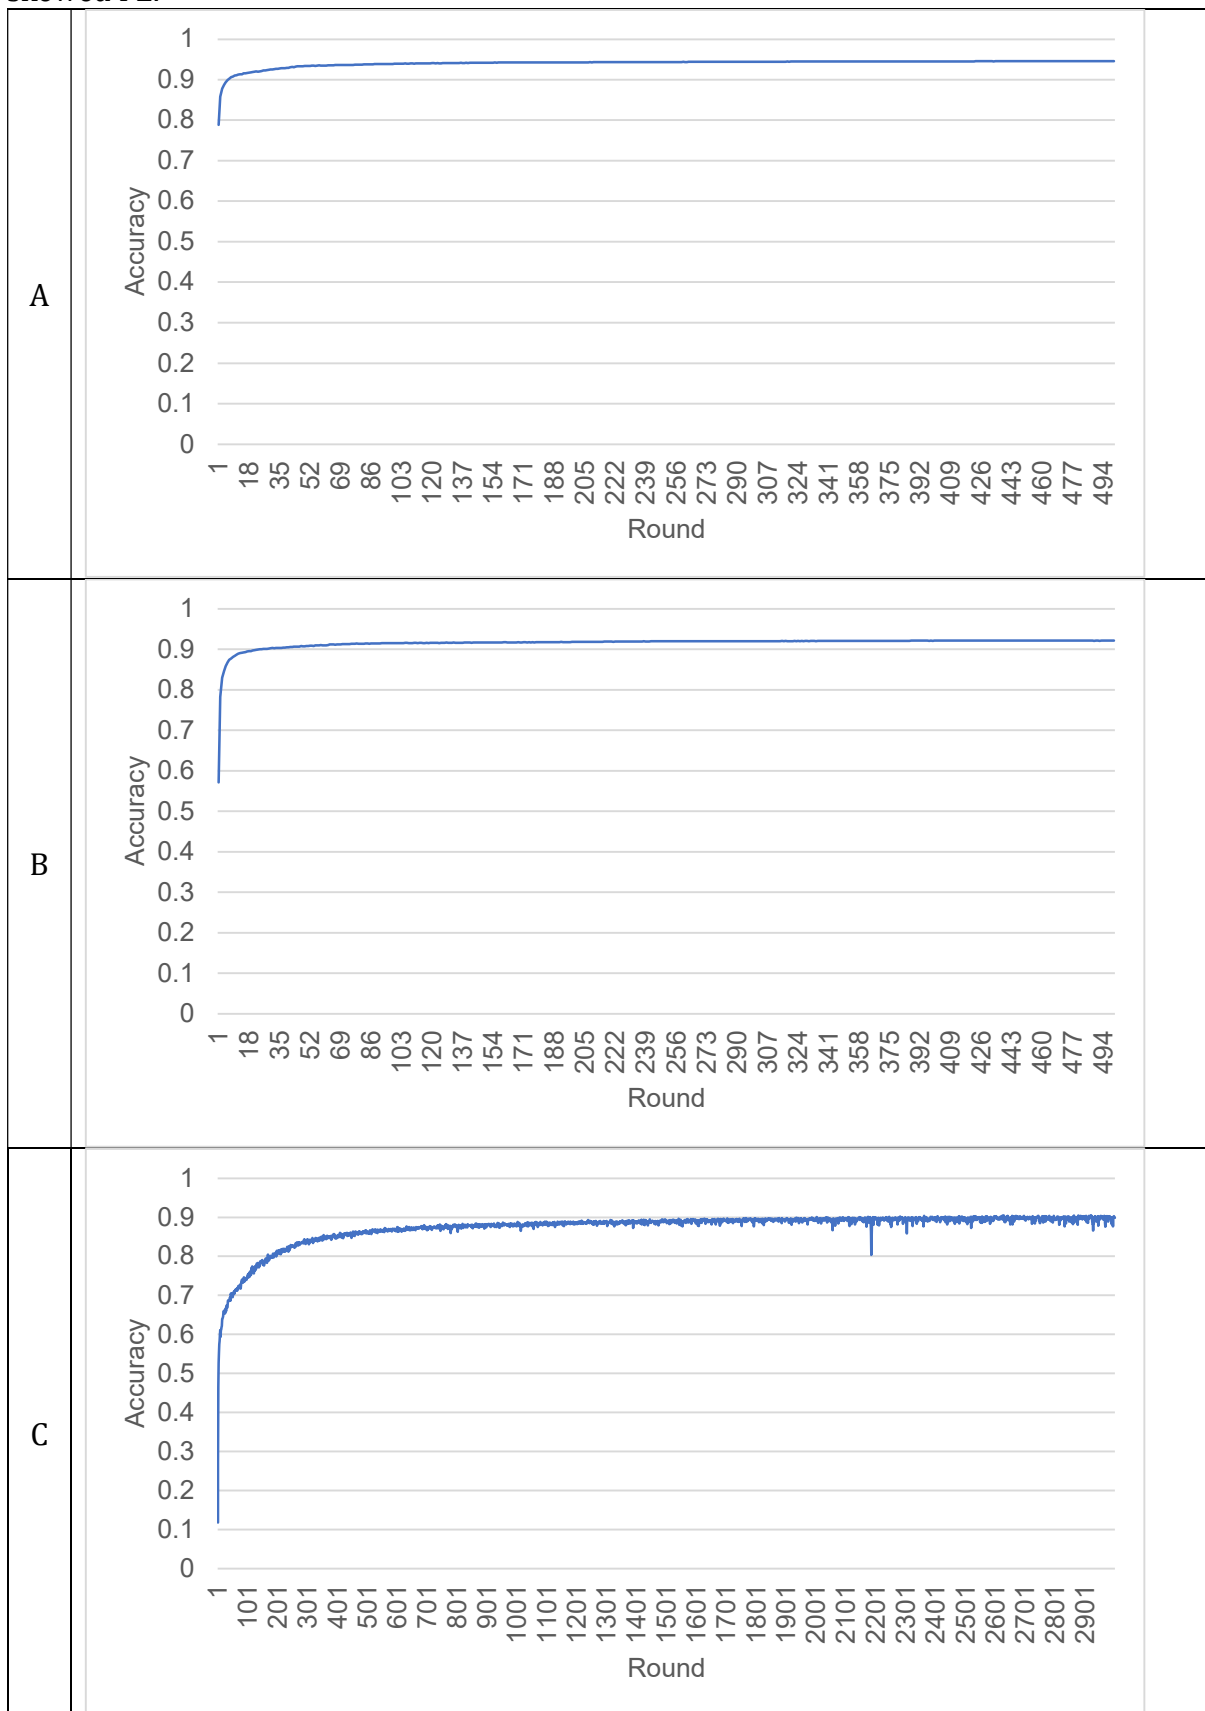

D

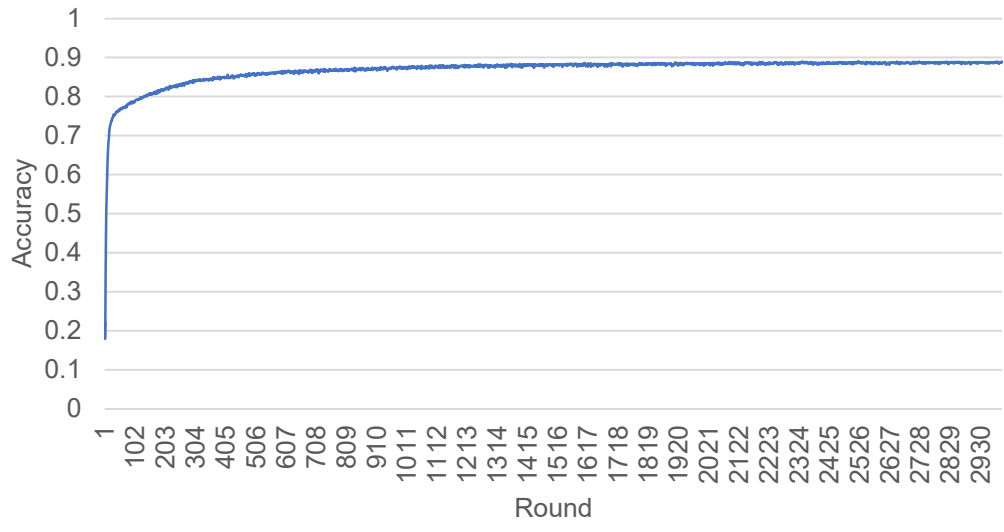

Supplement: jmir_v22i10e20891_app3.pdf [file jmir_v22i10e20891_app3.pdf]
