# Supplementary material for: Federated Learning on Clinical Benchmark Data: Performance Assessment
Source: PubMed Central journal article supplement (PMC7652692; doi:10.2196/20891), 2020-10-26
Supplement: jmir_v22i10e20891_app4.pdf [file jmir_v22i10e20891_app4.pdf]

**Multimedia Appendix 4.** Each digit class classification results of precision and recall in a centralized machine learning (CML) experiment using the MNIST dataset. All results are presented with a 95% confidence interval by resampling the validation task 100 times.

| CML | Precision            | Recall               |
|-----|----------------------|----------------------|
| 0   | 0.986 (0.955, 1.000) | 0.988 (0.961, 1.000) |
| 1   | 0.989 (0.966, 1.000) | 0.993 (0.973, 1.000) |
| 2   | 0.976 (0.943, 1.000) | 0.985 (0.956, 1.000) |
| 3   | 0.977 (0.943, 1.000) | 0.985 (0.954, 1.000) |
| 4   | 0.983 (0.953, 1.000) | 0.981 (0.948, 1.000) |
| 5   | 0.985 (0.955, 1.000) | 0.977 (0.942, 1.000) |
| 6   | 0.981 (0.948, 1.000) | 0.984 (0.955, 1.000) |
| 7   | 0.982 (0.949, 1.000) | 0.970 (0.932, 1.000) |
| 8   | 0.983 (0.953, 1.000) | 0.970 (0.932, 1.000) |
| 9   | 0.972 (0.935, 1.000) | 0.979 (0.946, 1.000) |
