# Supplementary material for: Federated Learning on Clinical Benchmark Data: Performance Assessment
Source: PubMed Central journal article supplement (PMC7652692; doi:10.2196/20891), 2020-10-26
Supplement: jmir_v22i10e20891_app5.pdf [file jmir_v22i10e20891_app5.pdf]

**Multimedia Appendix 5.** Each digit class classification result of precision and recall in the Basic FL experiment using the MNIST dataset. All results are presented with a 95% confidence interval by resampling the validation task 100 times.

| Basic FL | Precision            | Recall               |
|----------|----------------------|----------------------|
| 0        | 0.955 (0.910, 0.990) | 0.981 (0.952, 1.000) |
| 1        | 0.970 (0.938, 1.000) | 0.989 (0.966, 1.000) |
| 2        | 0.944 (0.898, 0.981) | 0.939 (0.883, 0.980) |
| 3        | 0.931 (0.875, 0.976) | 0.942 (0.887, 0.982) |
| 4        | 0.942 (0.892, 0.980) | 0.947 (0.899, 0.989) |
| 5        | 0.946 (0.890, 0.989) | 0.913 (0.850, 0.966) |
| 6        | 0.938 (0.885, 0.980) | 0.962 (0.917, 1.000) |
| 7        | 0.954 (0.905, 0.990) | 0.930 (0.874, 0.975) |
| 8        | 0.941 (0.888, 0.981) | 0.926 (0.866, 0.976) |
| 9        | 0.938 (0.884, 0.978) | 0.925 (0.870, 0.972) |
