# Supplementary material for: Federated Learning on Clinical Benchmark Data: Performance Assessment
Source: PubMed Central journal article supplement (PMC7652692; doi:10.2196/20891), 2020-10-26
Supplement: jmir_v22i10e20891_app6.pdf [file jmir_v22i10e20891_app6.pdf]

**Multimedia Appendix 6.** Each digit class classification result of precision and recall in the Imbalanced FL experiment using the MNIST dataset. All results are presented with a 95% confidence interval by resampling the validation task 100 times.

| Imbalanced FL | Precision            | Recall               |
|---------------|----------------------|----------------------|
| 0             | 0.942 (0.895, 0.981) | 0.981 (0.951, 1.000) |
| 1             | 0.960 (0.918, 0.992) | 0.980 (0.952, 1.000) |
| 2             | 0.914 (0.856, 0.966) | 0.907 (0.848, 0.956) |
| 3             | 0.902 (0.840, 0.955) | 0.908 (0.846, 0.959) |
| 4             | 0.906 (0.847, 0.958) | 0.919 (0.859, 0.968) |
| 5             | 0.904 (0.835, 0.961) | 0.873 (0.792, 0.940) |
| 6             | 0.936 (0.883, 0.979) | 0.928 (0.872, 0.974) |
| 7             | 0.934 (0.882, 0.978) | 0.921 (0.864, 0.969) |
| 8             | 0.911 (0.848, 0.965) | 0.888 (0.824, 0.947) |
| 9             | 0.899 (0.833, 0.952) | 0.898 (0.835, 0.952) |
