# Supplementary material for: Federated Learning on Clinical Benchmark Data: Performance Assessment
Source: PubMed Central journal article supplement (PMC7652692; doi:10.2196/20891), 2020-10-26
Supplement: jmir_v22i10e20891_app7.pdf [file jmir_v22i10e20891_app7.pdf]

**Multimedia Appendix 7.** Each digit class classification result of precision and recall in the Skewed FL experiment using the MNIST dataset. All results are presented with a 95% confidence interval by resampling the validation task 100 times.

---

| Skewed FL | Precision            | Recall               |
|-----------|----------------------|----------------------|
| 0         | 0.927 (0.872, 0.971) | 0.988 (0.961, 1.000) |
| 1         | 0.951 (0.906, 0.990) | 0.977 (0.944, 1.000) |
| 2         | 0.895 (0.833, 0.949) | 0.873 (0.810, 0.932) |
| 3         | 0.915 (0.856, 0.966) | 0.867 (0.790, 0.931) |
| 4         | 0.918 (0.863, 0.968) | 0.904 (0.838, 0.958) |
| 5         | 0.905 (0.837, 0.962) | 0.810 (0.728, 0.882) |
| 6         | 0.912 (0.851, 0.960) | 0.962 (0.918, 1.000) |
| 7         | 0.885 (0.821, 0.944) | 0.923 (0.867, 0.971) |
| 8         | 0.850 (0.778, 0.919) | 0.861 (0.784, 0.926) |
| 9         | 0.887 (0.822, 0.944) | 0.871 (0.805, 0.929) |

---
