# Supplementary material for: Federated Learning on Clinical Benchmark Data: Performance Assessment
Source: PubMed Central journal article supplement (PMC7652692; doi:10.2196/20891), 2020-10-26
Supplement: jmir_v22i10e20891_app8.pdf [file jmir_v22i10e20891_app8.pdf]

**Multimedia Appendix 8.** Each digit class classification result of precision and recall in an imbalanced and skewed FL experiment using the MNIST dataset. All results are presented with a 95% confidence interval by resampling the validation task 100 times.

| Imbalanced and skewed FL | Precision            | Recall               |
|--------------------------|----------------------|----------------------|
| 0                        | 0.899 (0.833, 0.955) | 0.978 (0.947, 1.000) |
| 1                        | 0.951 (0.906, 0.985) | 0.950 (0.909, 0.984) |
| 2                        | 0.916 (0.856, 0.969) | 0.873 (0.804, 0.932) |
| 3                        | 0.880 (0.812, 0.939) | 0.876 (0.804, 0.939) |
| 4                        | 0.906 (0.847, 0.960) | 0.878 (0.805, 0.937) |
| 5                        | 0.901 (0.826, 0.969) | 0.764 (0.674, 0.845) |
| 6                        | 0.860 (0.792, 0.922) | 0.957 (0.911, 0.991) |
| 7                        | 0.897 (0.830, 0.954) | 0.906 (0.845, 0.959) |
| 8                        | 0.825 (0.755, 0.899) | 0.855 (0.775, 0.920) |
| 9                        | 0.869 (0.795, 0.932) | 0.851 (0.782, 0.913) |
