# Supplementary material for: Federated Learning on Clinical Benchmark Data: Performance Assessment
Source: PubMed Central journal article supplement (PMC7652692; doi:10.2196/20891), 2020-10-26

**Multimedia Appendix 9.** Area under the receiver operating characteristic curve, which is the result of the in-hospital mortality prediction for each experiment, that is, basic and imbalanced FL, using the MIMIC-III dataset.

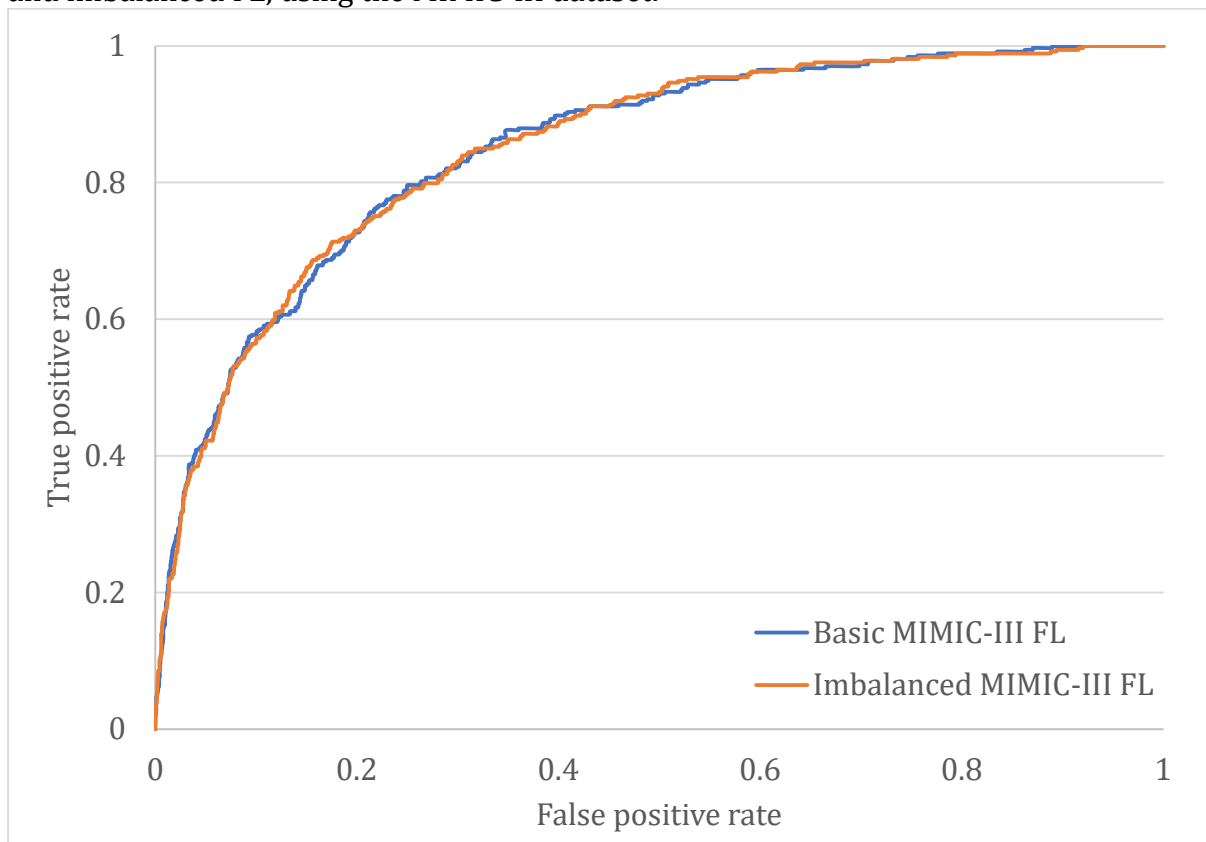

Supplement: jmir_v22i10e20891_app9.pdf [file jmir_v22i10e20891_app9.pdf]
