# Supplementary material for: Federated Learning on Clinical Benchmark Data: Performance Assessment
Source: PubMed Central journal article supplement (PMC7652692; doi:10.2196/20891), 2020-10-26
Supplement: jmir_v22i10e20891_app10.pdf [file jmir_v22i10e20891_app10.pdf]

**Multimedia Appendix 10.** Confusion matrix of federated learning (FL) to predict in-hospital mortality using MIMIC-III. (A) Basic FL. (B) Imbalanced FL.

|       |     |       |    |
|-------|-----|-------|----|
| 2,789 | 73  | 2,808 | 52 |
| 256   | 118 | 285   | 89 |
| A     |     | B     |    |
