# Supplementary material for: Federated Learning on Clinical Benchmark Data: Performance Assessment
Source: PubMed Central journal article supplement (PMC7652692; doi:10.2196/20891), 2020-10-26

**Multimedia Appendix 11.** Confusion matrices for the ECG experiments. (A) Centralized machine learning (CML). (B) Basic FL. (C) Imbalanced FL. Each class name is as follows: A - atrial fibrillation, N - normal sinus rhythm, O - alternative rhythm, and ~ - noisy.

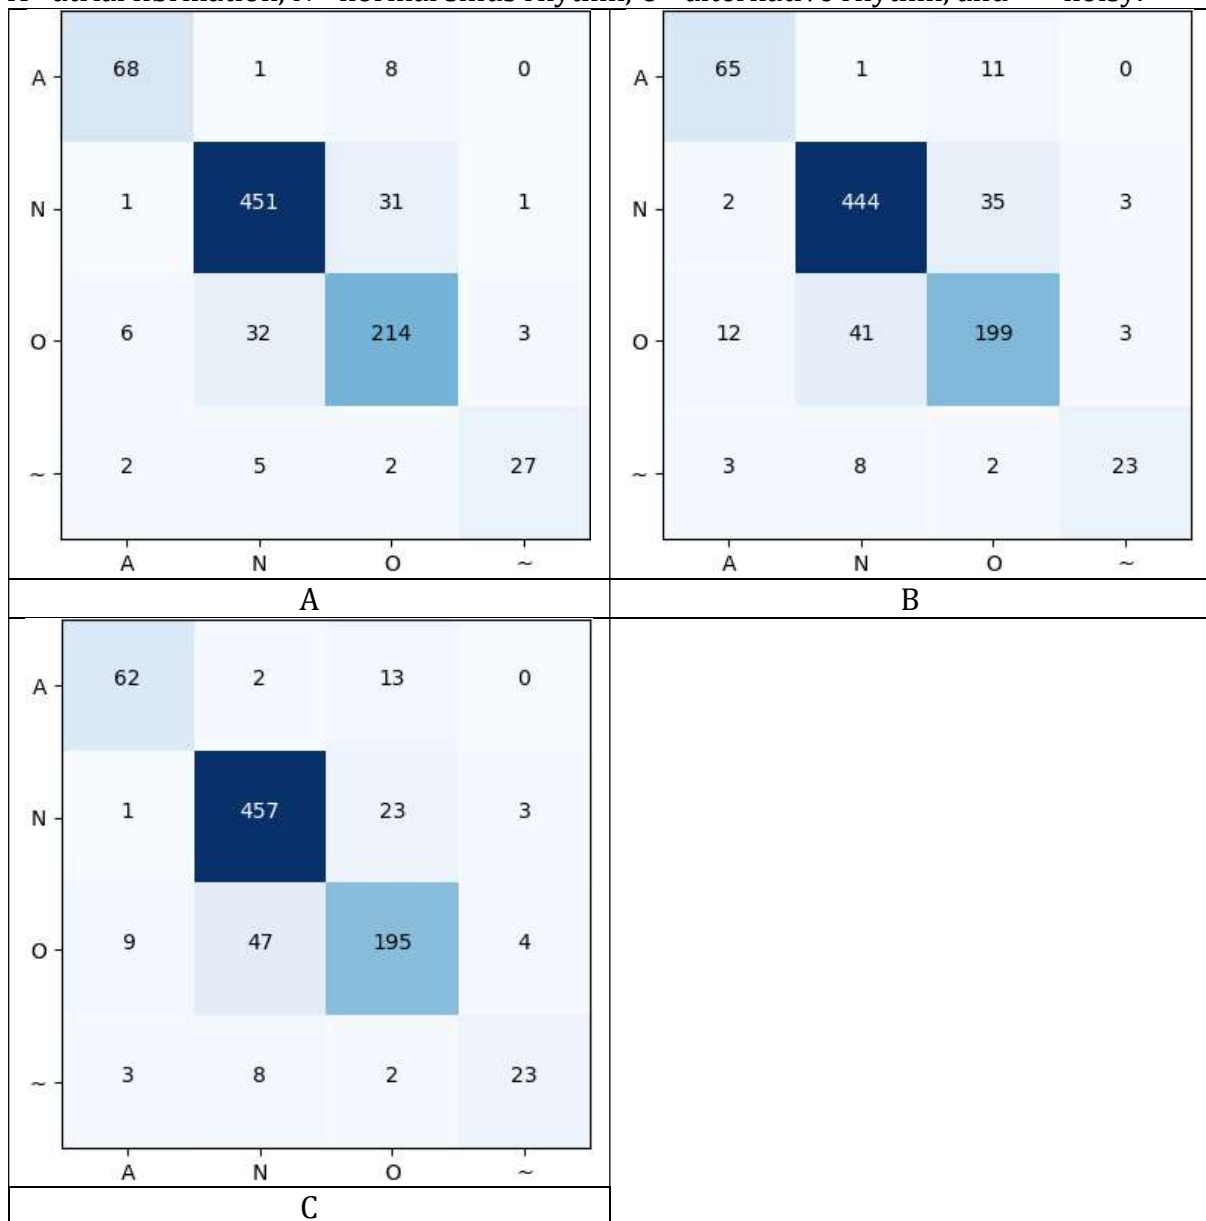

Supplement: jmir_v22i10e20891_app11.pdf [file jmir_v22i10e20891_app11.pdf]
