# Supplementary material for: Federated Learning on Clinical Benchmark Data: Performance Assessment
Source: PubMed Central journal article supplement (PMC7652692; doi:10.2196/20891), 2020-10-26
Supplement: jmir_v22i10e20891_app12.pdf [file jmir_v22i10e20891_app12.pdf]

**Multimedia Appendix 12.** Each class classification result of precision and recall in a centralized machine learning (CML) experiment using the ECG dataset. All results are presented with a 95% confidence interval by resampling the validation task 100 times.

| CML                 | Precision            | Recall               |
|---------------------|----------------------|----------------------|
| atrial fibrillation | 0.914 (0.667, 1.000) | 0.795 (0.545, 1.000) |
| normal sinus rhythm | 0.900 (0.825, 0.966) | 0.931 (0.885, 0.983) |
| alternative rhythm  | 0.820 (0.667, 0.925) | 0.779 (0.630, 0.914) |
| noisy               | 0.685 (0.250, 1.000) | 0.781 (0.333, 1.000) |
