# Supplementary material for: Federated Learning on Clinical Benchmark Data: Performance Assessment
Source: PubMed Central journal article supplement (PMC7652692; doi:10.2196/20891), 2020-10-26
Supplement: jmir_v22i10e20891_app13.pdf [file jmir_v22i10e20891_app13.pdf]

**Multimedia Appendix 13.** Each class classification result of precision and recall in the Basic FL experiment using the ECG dataset. All results are presented with a 95% confidence interval by resampling the validation task 100 times.

| Basic FL            | Precision            | Recall               |
|---------------------|----------------------|----------------------|
| atrial fibrillation | 0.806 (0.556, 1.000) | 0.876 (0.625, 1.000) |
| normal sinus rhythm | 0.904 (0.815, 0.965) | 0.919 (0.846, 0.984) |
| alternative rhythm  | 0.808 (0.640, 0.938) | 0.787 (0.656, 0.931) |
| noisy               | 0.821 (0.333, 1.000) | 0.637 (0.250, 1.000) |
