# Supplementary material for: Federated Learning on Clinical Benchmark Data: Performance Assessment
Source: PubMed Central journal article supplement (PMC7652692; doi:10.2196/20891), 2020-10-26
Supplement: jmir_v22i10e20891_app14.pdf [file jmir_v22i10e20891_app14.pdf]

**Multimedia Appendix 14.** Each class classification result of precision and recall in the Imbalanced FL experiment using the ECG dataset. All results are presented with a 95% confidence interval by resampling the validation task 100 times.

| Imbalanced FL       | Precision            | Recall               |
|---------------------|----------------------|----------------------|
| atrial fibrillation | 0.841 (0.600, 1.000) | 0.828 (0.626, 0.905) |
| normal sinus rhythm | 0.890 (0.783, 0.954) | 0.943 (0.889, 1.000) |
| alternative rhythm  | 0.833 (0.684, 0.960) | 0.767 (0.633, 0.914) |
| noisy               | 0.782 (0.250, 1.000) | 0.613 (0.200, 1.000) |
